# Supplementary material for: Stability of [10–12]cycloparaphenylene complexes with pristine fullerenes C76,78,84 and endohedral metallofullerenes M3N@C78,80
Source: Royal Society of Chemistry journal article supplement (doi:10.1039/d4nr02287d), 2024-01-01
Supplement: d4nr02287d1.pdf [file d4nr02287d1.pdf]

## Supplementary Information

### Stability of [10-12]cycloparaphenylene complexes with pristine fullerenes

#### $C_{76, 78, 84}$ and endohedral metallofullerenes $M_3N@C_{78, 80}$

Markus Freiburger<sup>†</sup>, Olga A. Stasyuk<sup>†</sup>, Eugenia M. Pérez-Ojeda, Luis A. Echegoyen,  
Miquel Solà\* and Thomas Drewello\*

## Table of contents

|                                              |    |
|----------------------------------------------|----|
| 1. Experimental Section.....                 | 3  |
| 2. Additional mass spectrometry results..... | 5  |
| 2.1 MS <sup>1</sup> spectra.....             | 6  |
| 2.2 MS <sup>2</sup> spectra.....             | 10 |
| 2.3 Breakdown Graphs.....                    | 13 |
| 3. DFT calculations.....                     | 15 |
| 3.1 Methodology.....                         | 15 |
| 3.2 Computational results.....               | 16 |
| 3.3 Cartesian coordinates.....               | 24 |
| 4. Literature.....                           | 40 |

## 1. Experimental Section

**Chemicals:** [n]CPPs and the fullerene C<sub>84</sub> were purchased from TCI (Belgium, HPLC grad) while trifluoroacetic acid (TFA) and the fullerenes C<sub>76/78</sub> were purchased from Merck (Germany, HPLC grade). The solvents acetonitrile (ACN), dichloromethane (DCM) and toluene (tol) were purchased from VWR (Belgium, HPLC grade). Isomerically pure M<sub>3</sub>N@I<sub>h</sub>-C<sub>80</sub> (M = Y, Gd, Lu) were purchased from Luna Innovations (Roanoke, VA, USA). The Sc<sub>3</sub>N@C<sub>2n</sub> (n = 39, 40) isomers of this family were synthesized in an arc-discharge reactor using ammonia as a reactive-gas atmosphere and graphite rods packed with a mixture of Sc<sub>2</sub>O<sub>3</sub> and graphite powder.<sup>[1]</sup> Starting with a mixture of Sc<sub>3</sub>N@C<sub>2n</sub> (n = 34, 39, 40), large quantities of isomerically pure Sc<sub>3</sub>N@I<sub>h</sub>-C<sub>80</sub> were separated in a single step by selective chemical oxidation/reduction using acetylferrocenium [Fe(COCH<sub>3</sub>C<sub>5</sub>-H<sub>44</sub>)Cp]<sup>+</sup> as an oxidizing agent and CH<sub>3</sub>SNa as a reducing agent.<sup>[2]</sup> Sc<sub>3</sub>N@D<sub>3h</sub>-C<sub>78</sub> was purified by three cycles of selective oxidative/reductive steps.<sup>[2]</sup> Finally, Sc<sub>3</sub>N@D<sub>5h</sub>-C<sub>80</sub> was purified using a combination of two non-chromatographic methods, selective oxidative/reductive removal and reactivity differences.<sup>[2-3]</sup>

**Sample preparation:** Stock solutions of [n]CPPs were prepared in DCM (0.2 g l<sup>-1</sup>) while the stock solutions of C<sub>84</sub> and all EMFs were prepared in tol (0.2 – 0.5 g l<sup>-1</sup>). For the ESI experiments a solvent mixture of ACN/DCM/tol (3:2:1, v:v:v) was used to which a small amount of TFA was added to enhance ionization.<sup>[4]</sup> The analyte concentrations was 1 x 10<sup>-5</sup> mol l<sup>-1</sup> in case of [n]CPPs while the concentration of the EMFs was up to three times the CPP concentration to enhance complex formation. The total concentration of C<sub>84</sub> was unknown due to solubility issues.

**Instrumentation:** All mass spectrometry experiments were performed on a quadrupole time-of-flight mass spectrometer (microTOF-Q II, Bruker Daltonics, Bremen) equipped with an electrospray ionization (ESI) source. The analyte solutions were directly injected into the ESI source with a syringe pump at a flow rate of 180 µl h<sup>-1</sup>. The temperature of the nitrogen heating gas was set to 180 °C and a capillary voltage of -4.5 kV was applied. Prior to each experiment, the instrument parameters were optimized to obtain good signal intensities. MS<sup>2</sup> experiments were carried out with N<sub>2</sub> as collision gas which was generated by a Parker LCMS64 nitrogen generator with a purity of 99.999% and a flow rate of 0.2 l min<sup>-1</sup>.

**Breakdown graphs:** Breakdown graphs are a plot of the survival yield (SY) as a function of the collision energy. The SY is the ratio of precursor ions surviving the collision event at a given

collision energy against the total amount of ions observed. The collision energy is given as the laboratory energy ( $E_{\text{lab}}$ ) divided by the degrees of freedom (DoF) of the hosting CPP. This approach of defining the collision energy is based on previous studies of our group.<sup>[5-7]</sup> However, the importance of considering DoF in the description of the collision event has also been addressed in several other publications.<sup>[8-17]</sup> The number of DoF was calculated according to Eqn. 1:

$$DoF = (3 * n) - 6 \tag{1}$$

With  $n$  corresponding to the number of atoms of the CPP.

All SY curves were recorded under multiple collision conditions and fitted with a sigmoid Boltzmann function. The collision energy,  $E_{50}$ , at which 50% of the parent ions have dissociated into their fragment ions is chosen as a relative measure of stability. The fragmentation energies obtained represent relative rather than absolute values with respect to the actual energy demand of the dissociation processes.

## 2. Additional mass spectrometry results

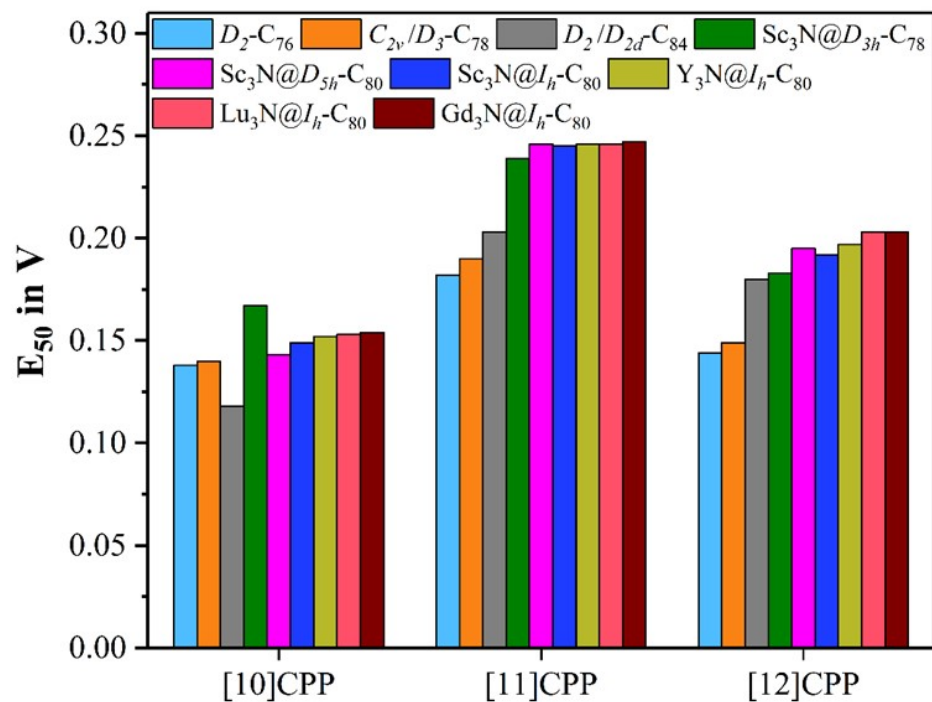

**Figure S1.** Collision energy,  $E_{50}$ , at which 50% of the parent ions have dissociated, for the studied host-guest complexes between [10]-, [11]- and [12]CPP and various fullerenes.

## 2.1 MS<sup>1</sup> spectra

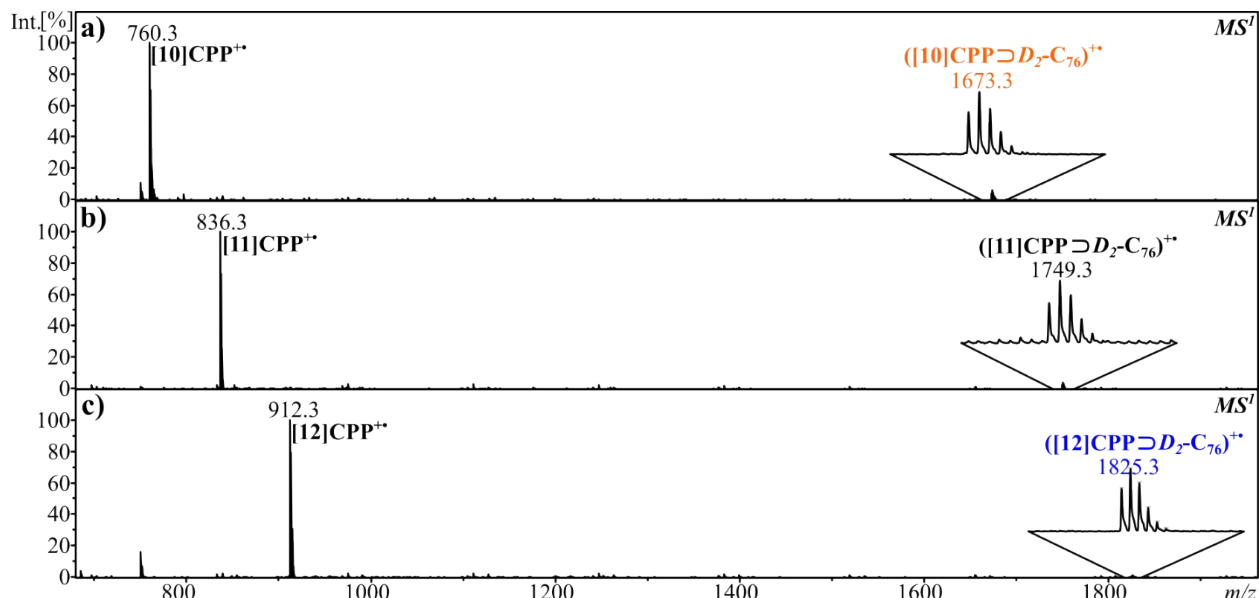

**Figure S2.** Positive-ion mode ESI MS<sup>1</sup> spectra of solutions containing C<sub>76</sub> and a) [10]CPP, b) [11]CPP or c) [12]CPP.

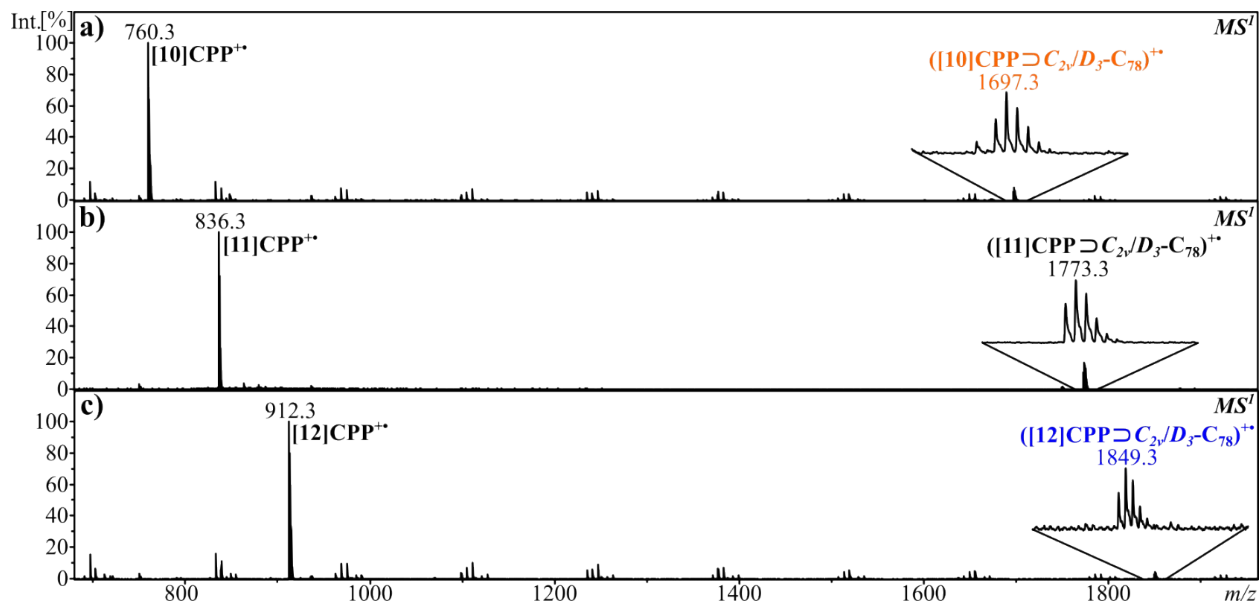

**Figure S3.** Positive-ion mode ESI MS<sup>1</sup> spectra of solutions containing C<sub>78</sub> and a) [10]CPP, b) [11]CPP or c) [12]CPP.

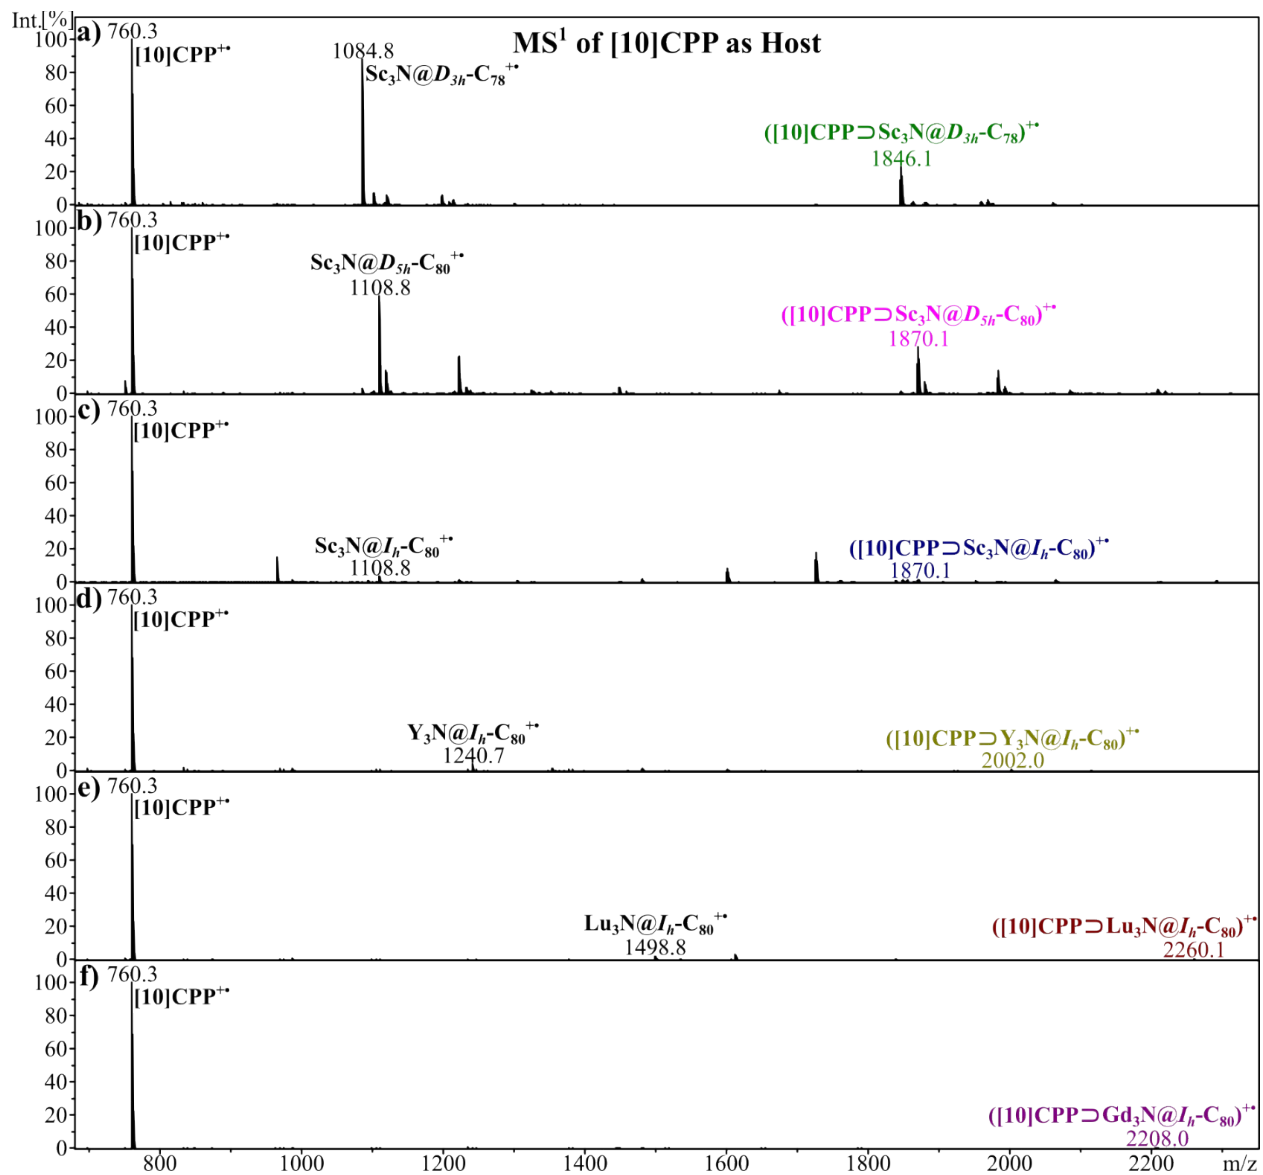

**Figure S4.** Positive ion-mode ESI MS<sup>1</sup> spectra of solutions containing [10]CPP and **a)** Sc<sub>3</sub>N@D<sub>3h</sub>-C<sub>78</sub>, **b)** Sc<sub>3</sub>N@D<sub>5h</sub>-C<sub>80</sub>, **c)** Sc<sub>3</sub>N@I<sub>h</sub>-C<sub>80</sub>, **d)** Y<sub>3</sub>N@I<sub>h</sub>-C<sub>80</sub>, **e)** Lu<sub>3</sub>N@I<sub>h</sub>-C<sub>80</sub> and **f)** Gd<sub>3</sub>N@I<sub>h</sub>-C<sub>80</sub>.

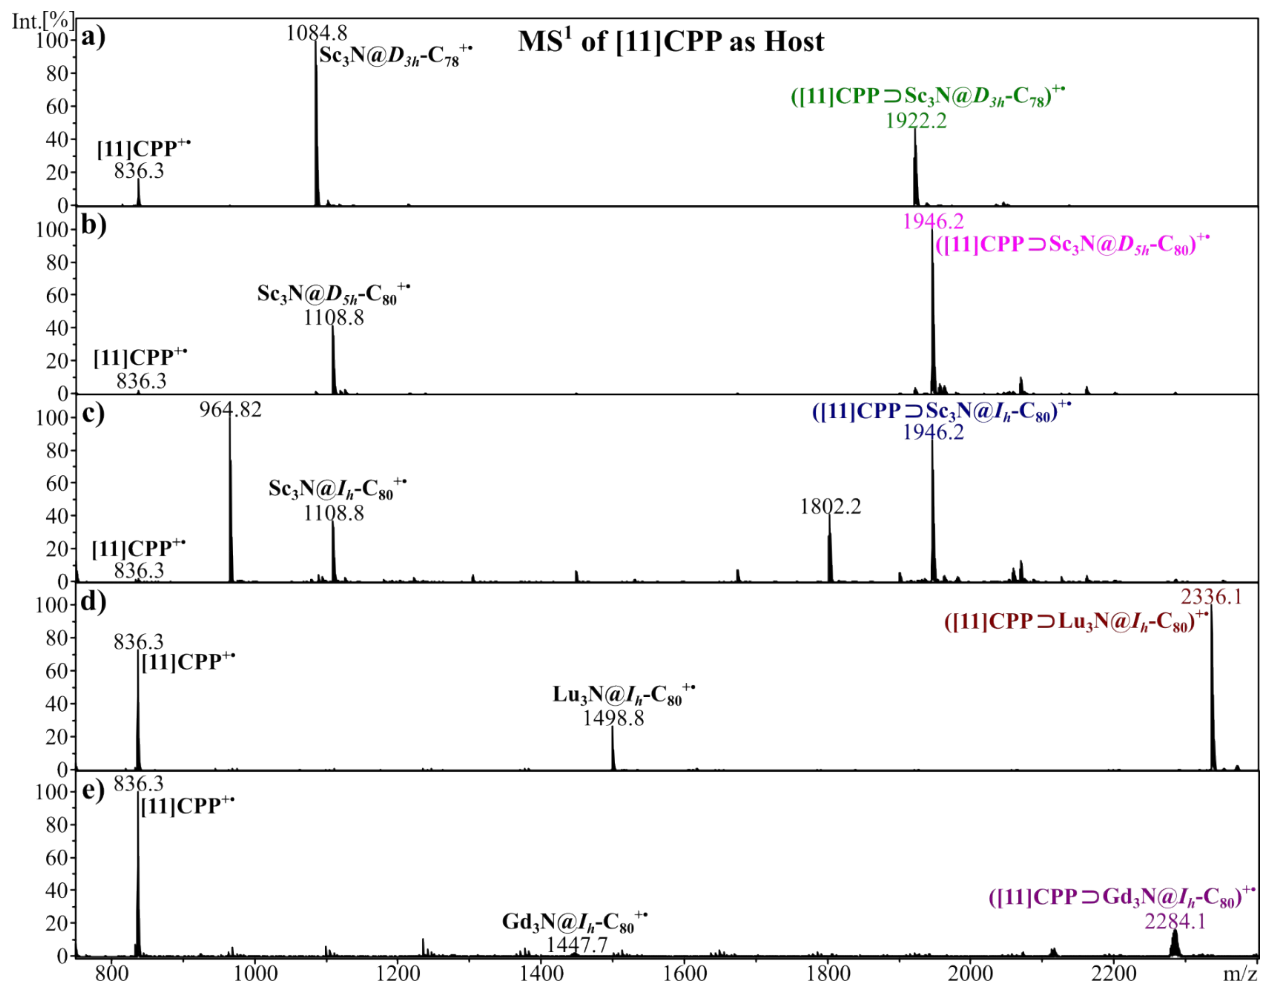

**Figure S5.** Positive ion-mode ESI MS<sup>1</sup> spectra of solutions containing [11]CPP and a) Sc<sub>3</sub>N@D<sub>3h</sub>-C<sub>78</sub>, b) Sc<sub>3</sub>N@D<sub>5h</sub>-C<sub>80</sub>, c) Sc<sub>3</sub>N@I<sub>h</sub>-C<sub>80</sub>, d) Lu<sub>3</sub>N@I<sub>h</sub>-C<sub>80</sub> and e) Gd<sub>3</sub>N@I<sub>h</sub>-C<sub>80</sub>.



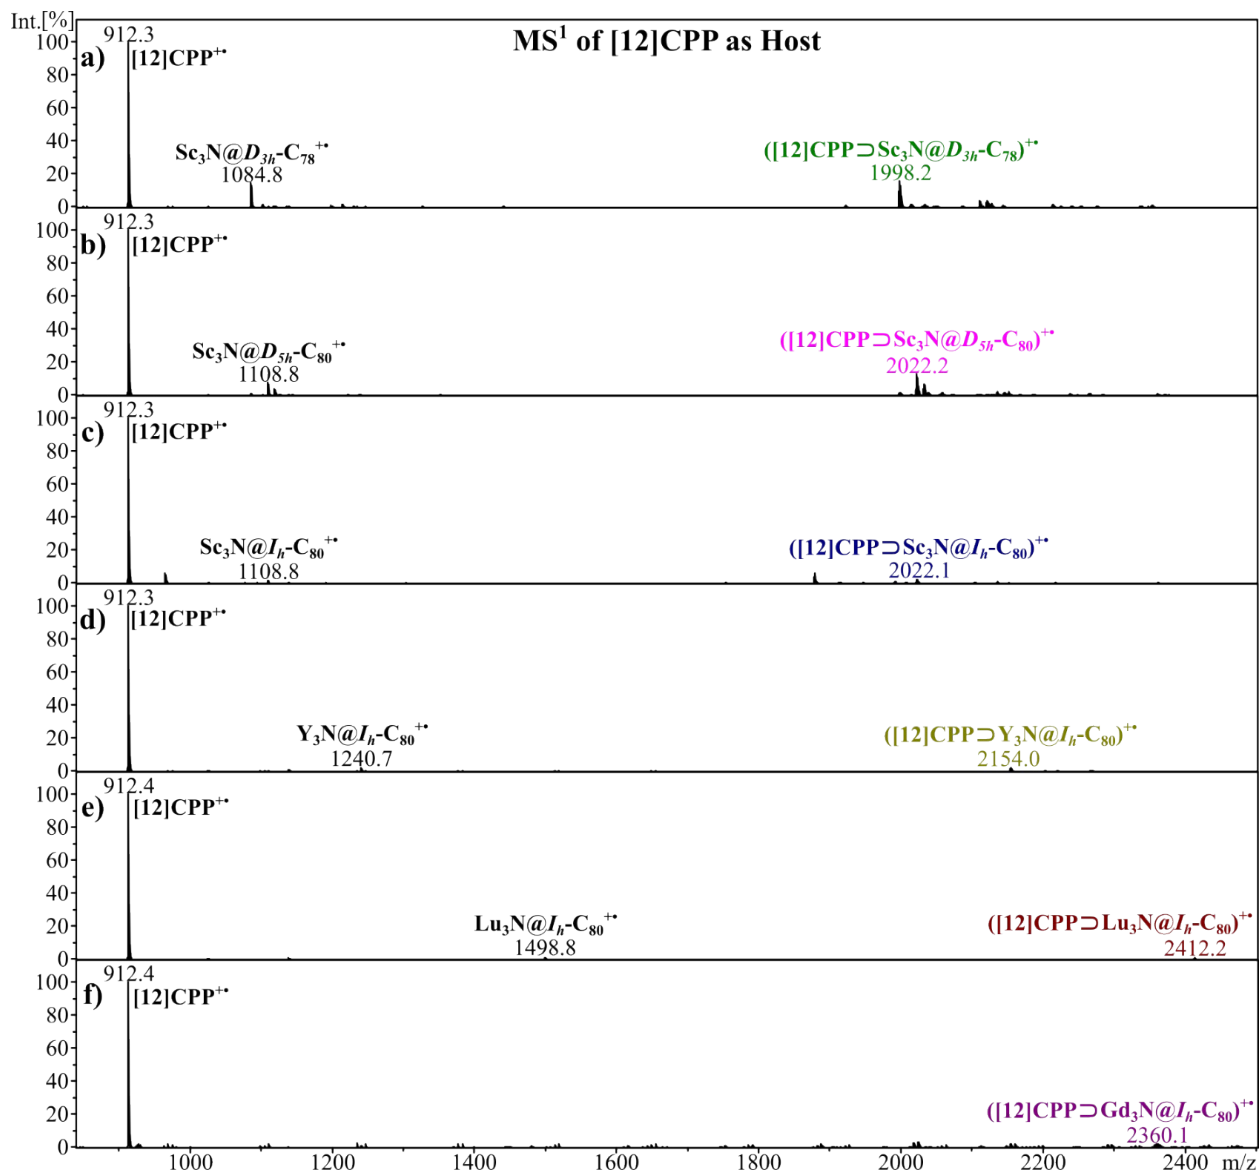

**Figure S6.** Positive ion-mode ESI MS<sup>1</sup> spectra of solutions containing [12]CPP and **a)** Sc<sub>3</sub>N@D<sub>3h</sub>-C<sub>78</sub>, **b)** Sc<sub>3</sub>N@D<sub>5h</sub>-C<sub>80</sub>, **c)** Sc<sub>3</sub>N@I<sub>h</sub>-C<sub>80</sub>, **d)** Y<sub>3</sub>N@I<sub>h</sub>-C<sub>80</sub>, **e)** Lu<sub>3</sub>N@I<sub>h</sub>-C<sub>80</sub> and **f)** Gd<sub>3</sub>N@I<sub>h</sub>-C<sub>80</sub>.

We also observe complex formation between the hosts [10] and [12]CPP and the EMF guests. However, the intensities of the corresponding signals are decreased compared to the [11]CPP based host-guest complexes indicating a reduced tendency to complex formation (as already shown for the C<sub>84</sub> guest, Figure 2).

## 2.2 MS<sup>2</sup> spectra

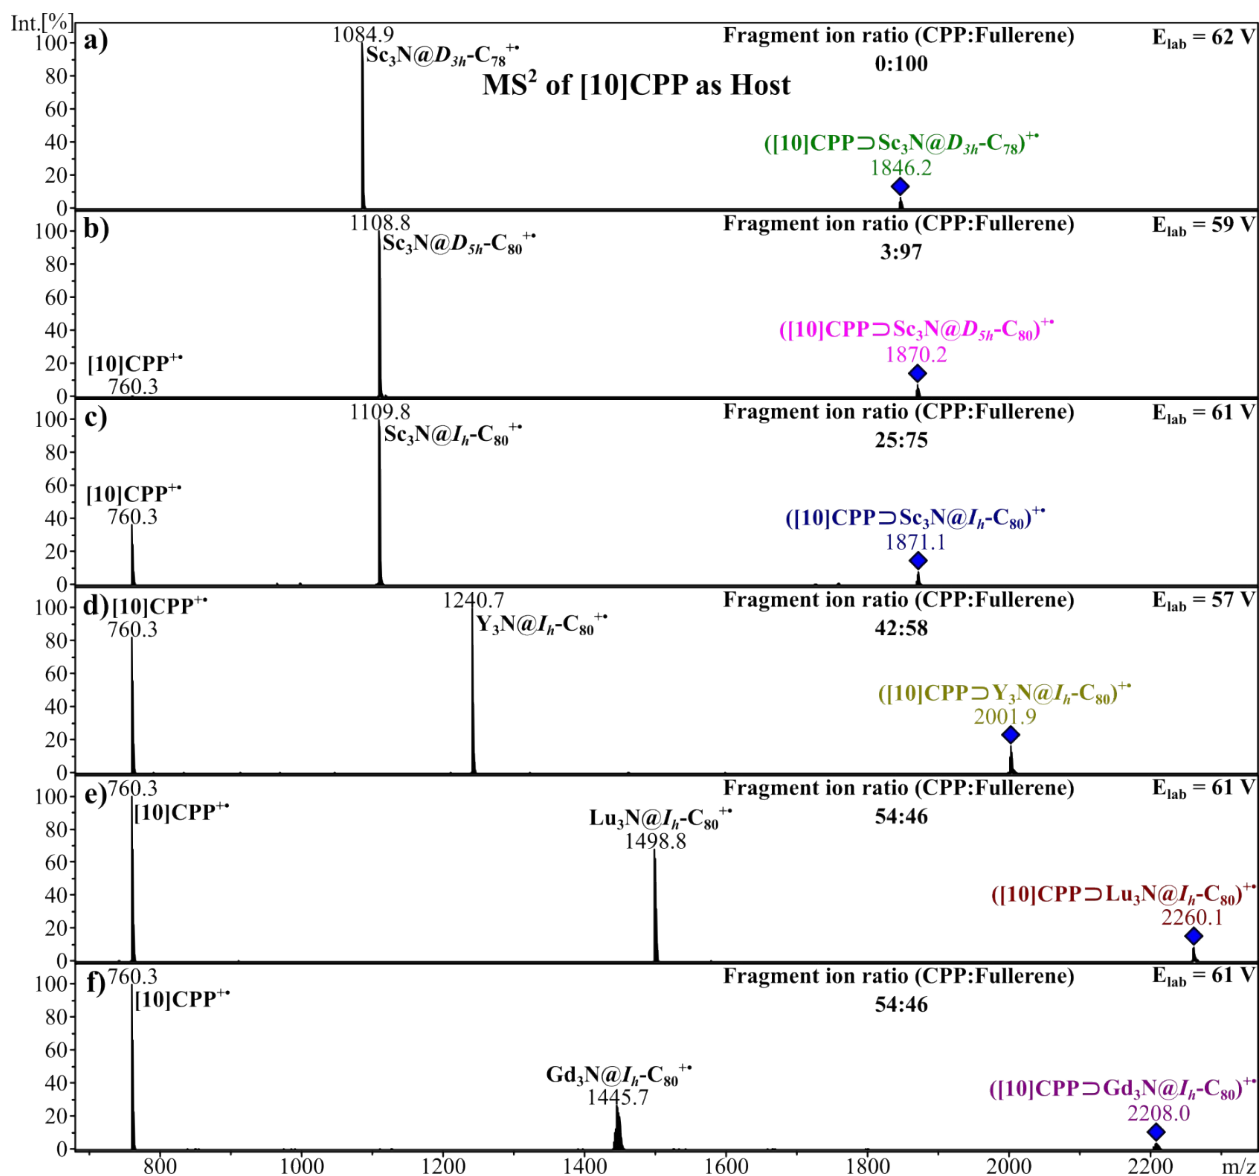

**Figure S7.** MS<sup>2</sup> spectra of **a)** ([10]CPP ⊃ Sc<sub>3</sub>N@D<sub>3h</sub>-C<sub>78</sub>)<sup>++</sup>, **b)** ([10]CPP ⊃ Sc<sub>3</sub>N@D<sub>5h</sub>-C<sub>80</sub>)<sup>++</sup>, **c)** ([10]CPP ⊃ Sc<sub>3</sub>N@I<sub>h</sub>-C<sub>80</sub>)<sup>++</sup>, **d)** ([10]CPP ⊃ Y<sub>3</sub>N@I<sub>h</sub>-C<sub>80</sub>)<sup>++</sup>, **e)** ([10]CPP ⊃ Lu<sub>3</sub>N@I<sub>h</sub>-C<sub>80</sub>)<sup>++</sup> and **f)** ([10]CPP ⊃ Gd<sub>3</sub>N@I<sub>h</sub>-C<sub>80</sub>)<sup>++</sup>.

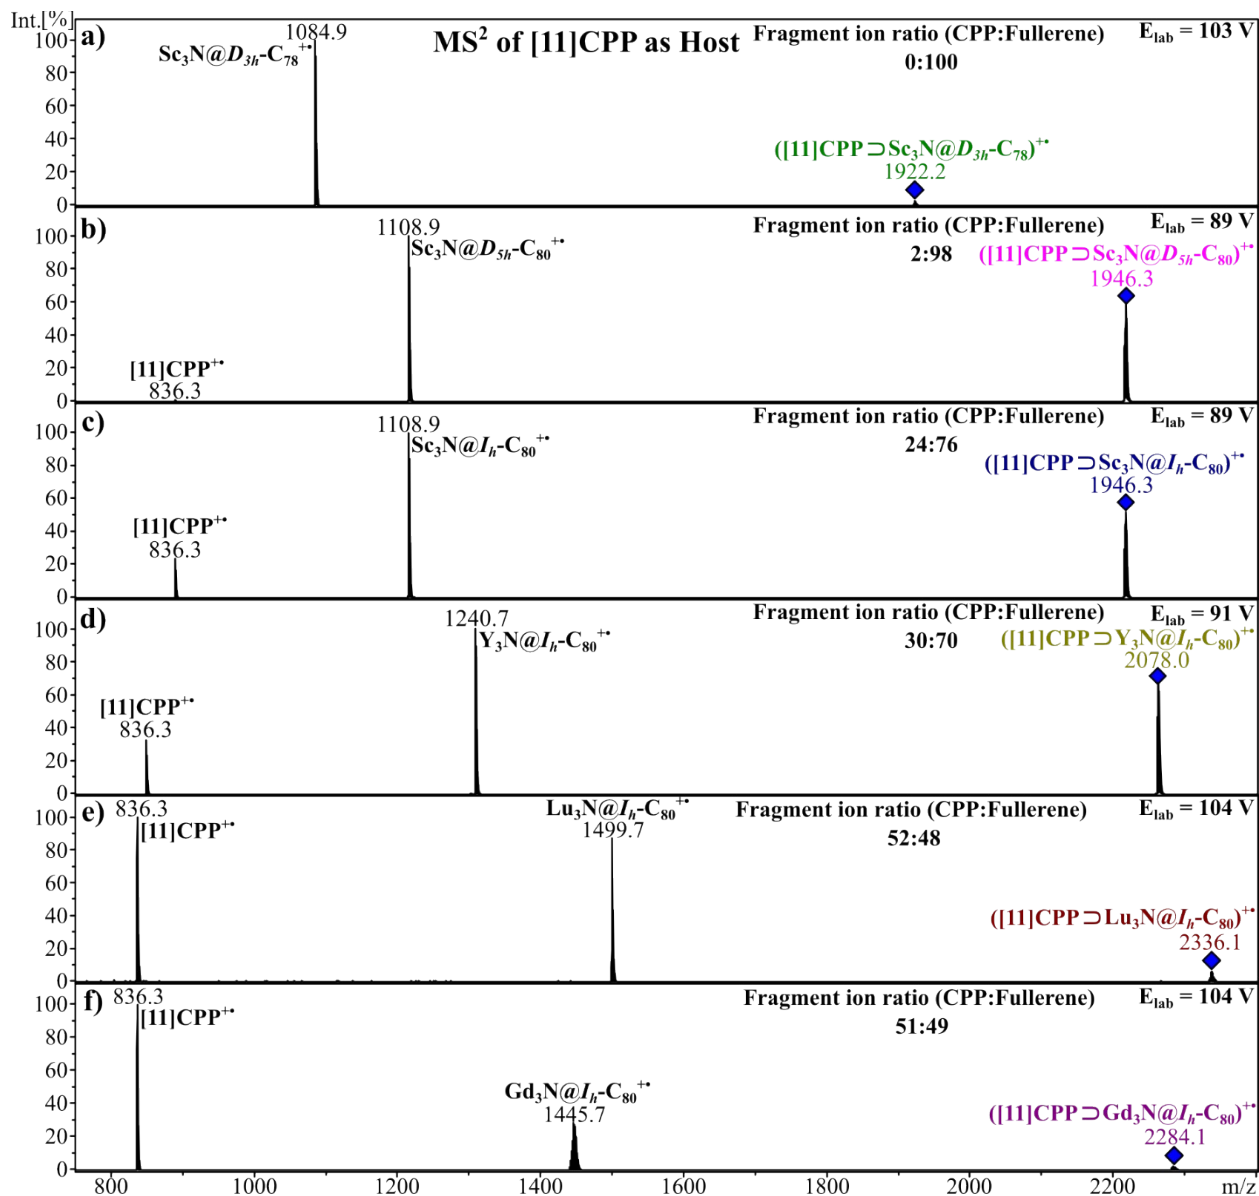

**Figure S8.** MS<sup>2</sup> spectra of **a)**  $([11]CPP \supset Sc_3N@D_{3h}-C_{78})^{+}$ , **b)**  $([11]CPP \supset Sc_3N@D_{5h}-C_{80})^{+}$ , **c)**  $([11]CPP \supset Sc_3N@I_h-C_{80})^{+}$ , **d)**  $([11]CPP \supset Y_3N@I_h-C_{80})^{+}$ , **e)**  $([11]CPP \supset Lu_3N@I_h-C_{80})^{+}$  and **f)**  $([11]CPP \supset Gd_3N@I_h-C_{80})^{+}$ .

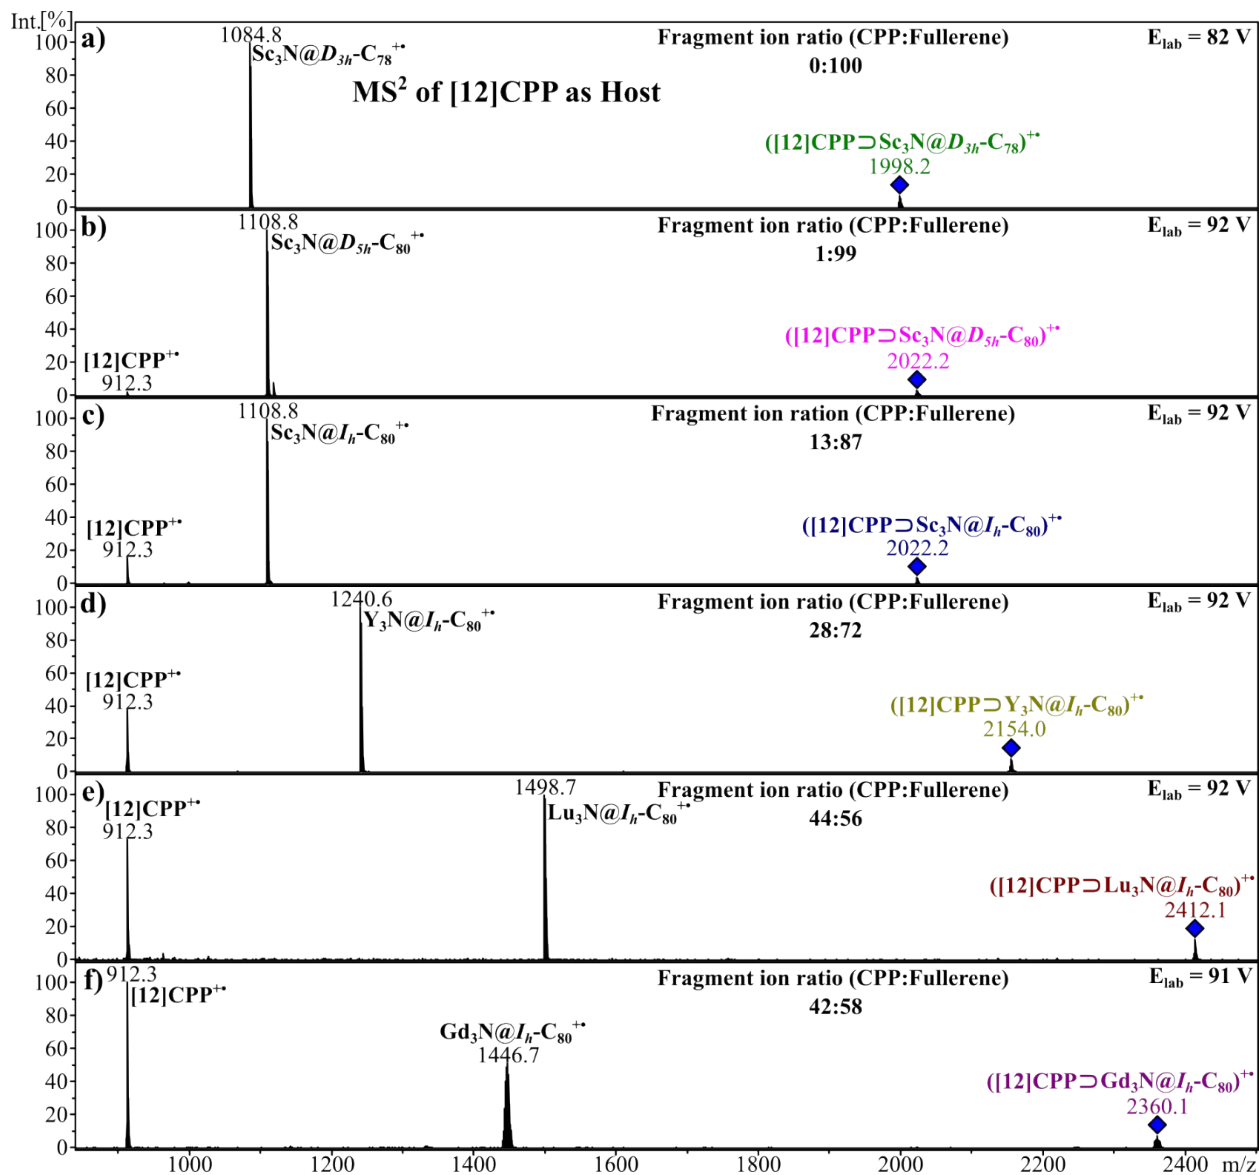

**Figure S9.** MS<sup>2</sup> spectra of **a)** ([12]CPP⊃Sc<sub>3</sub>N@D<sub>3h</sub>-C<sub>78</sub>)<sup>++</sup>, **b)** ([12]CPP⊃Sc<sub>3</sub>N@D<sub>5h</sub>-C<sub>80</sub>)<sup>++</sup>, **c)** ([12]CPP⊃Sc<sub>3</sub>N@I<sub>h</sub>-C<sub>80</sub>)<sup>++</sup>, **d)** ([12]CPP⊃Y<sub>3</sub>N@I<sub>h</sub>-C<sub>80</sub>)<sup>++</sup>, **e)** ([12]CPP⊃Lu<sub>3</sub>N@I<sub>h</sub>-C<sub>80</sub>)<sup>++</sup> and **f)** ([12]CPP⊃Gd<sub>3</sub>N@I<sub>h</sub>-C<sub>80</sub>)<sup>++</sup>.

By and large the same charge distributions and trends as observed and discussed for [11]CPP (main article) are found.

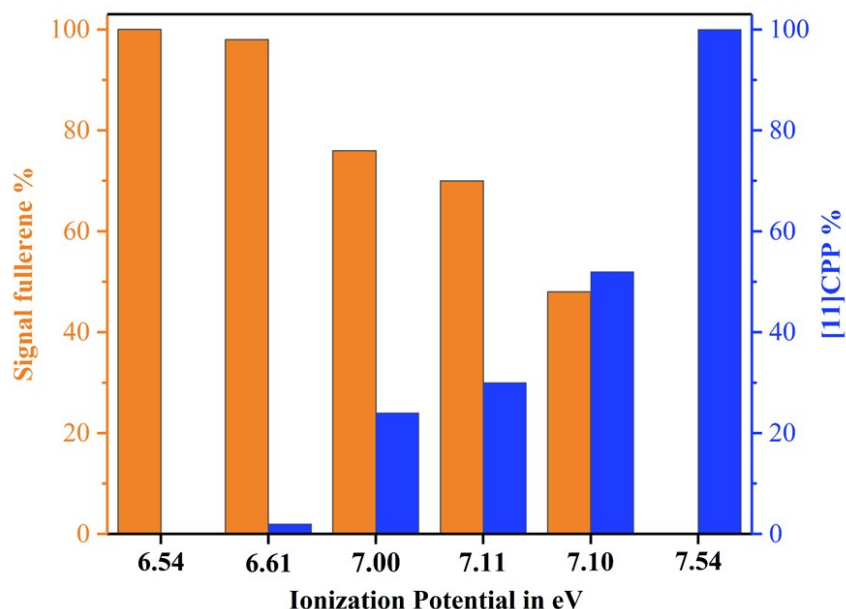

**Figure S10.** Trends in the intensities of fullerene and [11]CPP signals in MS<sup>2</sup> spectra depending on the ionization potential (IP) of the fullerene.

### 2.3 Breakdown Graphs

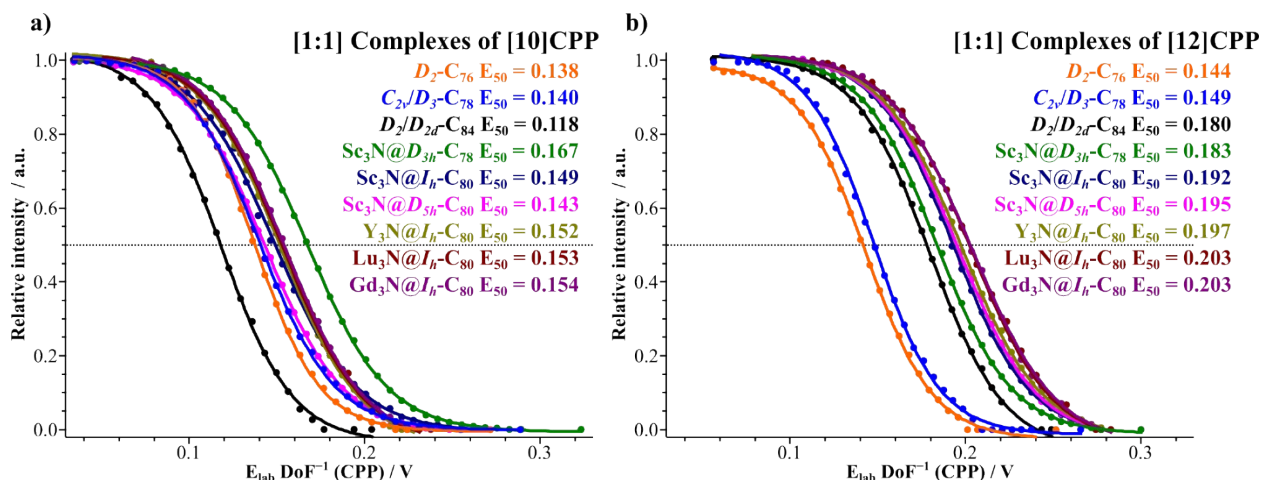

**Figure S11.** Energy-resolved collision-induced dissociation graphs (breakdown graphs) of host-guest complexes between a) [10]CPP and  $D_2$ -C<sub>76</sub>,  $C_{2v}/D_3$ -C<sub>78</sub>,  $D_2/D_{2d}$ -C<sub>84</sub>,  $Sc_3N@D_{3h}$ -C<sub>78</sub>,  $M_3N@C_{80}$  ( $I_h$ , M = Sc, Y, Gd, Lu;  $D_{5h}$ , M = Sc) and b) [12]CPP and  $D_2$ -C<sub>76</sub>,  $C_{2v}/D_3$ -C<sub>78</sub>,  $D_2/D_{2d}$ -C<sub>84</sub>,  $Sc_3N@D_{3h}$ -C<sub>78</sub>,  $M_3N@C_{80}$  ( $I_h$ , M = Sc, Y, Gd, Lu;  $D_{5h}$ , M = Sc).

As already observed for [11]CPP, the complexes of [10/12]CPP (Figure S7) with EMFs are more stable than the complexes with pristine fullerenes. In case of [10]CPP as host (Figure S10a), we find a different order of stabilities within the EMF based complexes (compared to [11]CPP and [12]CPP). Here,  $\text{Sc}_3\text{N}@C_{78}$  forms the most stable complex and not the EMFs with a  $C_{80}$  core. We relate this observation to the size of [10]CPP. [10]CPP is not an ideal host for any of the studied fullerenes due to its rather small cavity.<sup>[18]</sup> Therefore, [10]CPP prefers to bind the smallest fullerene in the tested series, which is  $\text{Sc}_3\text{N}@C_{78}$ . This observation is also consistent with the fragmentation energies of complexes between [10]CPP and pristine fullerenes ( $E_{50}: C_{84} < C_{76} = C_{78}$ ).

The relative order of stabilities for the [12]CPP host follows the order of [11]CPP based complexes. However, the complex with  $C_{84}$  is not significantly less stable than the complexes with EMFs. We relate this observation to the diameter of [12]CPP.  $C_{84}$  offers a larger fullerene core than the EMFs and, hence, more stabilization with the [12]CPP host via dispersion interactions is possible while complexes with EMFs suffer more severely from a size mismatch.

Comparing the complex stabilities of different CPP sizes ([10/11/12]CPP $\supset$ EMF), we find the following order: [11]CPP > [12]CPP > [10]CPP.

This observation is in good agreement with the expected interaction strengths based on the breakdown graphs of the respective complexes with  $C_{76/78/84}$ .

### 3. DFT calculations

#### 3.1 Methodology

Geometry optimization of the complexes was performed using the DFT BLYP functional<sup>[19-20]</sup> with D3(BJ) dispersion correction<sup>[21-22]</sup> and def2-SVP basis set.<sup>[23-24]</sup> For efficient calculations, effective core potentials for heavy atoms (ECP28MWB for Y and Lu,<sup>[25-26]</sup> ECP54MWB for Gd<sup>[27-28]</sup>) and resolution of identity (RI) approximation were used as implemented in the ORCA 4.1.2 program.<sup>[29-30]</sup> The complexes were treated in the form of radical cations (charge +1, multiplicity 2 for all [11]CPP $\supset$ M<sub>3</sub>N@C<sub>80</sub>, except for [11]CPP $\supset$ Gd<sub>3</sub>N@C<sub>80</sub> with charge +1, multiplicity 7). Open-shell species were treated with the unrestricted formalism.

For the assessment of the fragmentation energy, single point energy calculations at the  $\omega$ -B97M-V/def2-TZVPP level were additionally performed on the BLYP-D3(BJ)/def2-SVP optimized geometries. Such multi-level approach is common in computational chemistry and allows for large savings in computational resources without significant loss of accuracy. Two fragmentation schemes were taken into account:

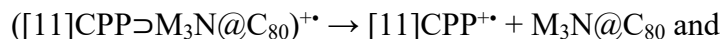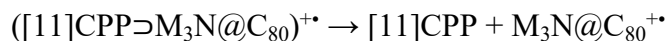

The fragmentation energy was calculated as the energy difference between the sum of energies of [n]CPP and fullerene and the energy of [n]CPP $\supset$ fullerene complex.

Vertical ionization potential (IP) was calculated using two DFT functionals:  $\omega$ B97M-V and CAM-B3LYP. VIP refers to the amount of energy required to remove one electron from the species to form a positive charge ( $\text{IP} = E_{\text{cation}} - E_{\text{neutral}}$ ). The cation was taken in the same geometry as the BLYP-D3(BJ)/def-SVP optimized geometry for the neutral system. The molecular structures and orbitals were visualized with Chemcraft 1.8.<sup>[31]</sup> The NCI analysis was carried out using Critic2 program.<sup>[32]</sup>

### 3.2 Computational results

**Table S1.** HOMO energy (in eV) and ionization potential (IP, in eV) of fullerenes and [11]CPP in isolated form and in their neutral complexes calculated at the  $\omega$ B97M-V/def2-TZVPP level.

| System                                             | HOMO<br>(isolated) | IP<br>(isolated) | HOMO<br>(complex) | IP<br>(complex) |
|----------------------------------------------------|--------------------|------------------|-------------------|-----------------|
| Sc <sub>3</sub> N@I <sub>h</sub> -C <sub>80</sub>  | -7.30              | 7.00             | -7.11             | 6.74            |
| Sc <sub>3</sub> N@D <sub>5h</sub> -C <sub>80</sub> | -6.92              | 6.61             | -6.69             | 6.28            |
| Y <sub>3</sub> N@I <sub>h</sub> -C <sub>80</sub>   | -7.39              | 7.11             | -7.15             | 6.77            |
| Lu <sub>3</sub> N@I <sub>h</sub> -C <sub>80</sub>  | -7.37              | 7.10             | -7.13             | 6.76            |
| D <sub>2d</sub> -C <sub>84</sub>                   | -7.87              | 7.54             | -7.59             | 7.12            |
| [11]CPP                                            | -7.21              | 7.07             | n/a               | n/a             |

**Table S2.** Energy of selected occupied molecular orbitals (in eV) located on fullerene or CPP fragments of neutral complexes calculated at the  $\omega$ B97M-V/def2-TZVPP level.

| Complex                                                             | Located on C <sub>80</sub> /C <sub>84</sub><br>fragment | Located on [11]CPP<br>fragment |
|---------------------------------------------------------------------|---------------------------------------------------------|--------------------------------|
| [11]CPP $\supset$ Sc <sub>3</sub> N@I <sub>h</sub> -C <sub>80</sub> | -7.11 HOMO                                              | -7.51 HOMO-4                   |
| [11]CPP $\supset$ Y <sub>3</sub> N@I <sub>h</sub> -C <sub>80</sub>  | -7.15 HOMO                                              | -7.48 HOMO-4                   |
| [11]CPP $\supset$ Lu <sub>3</sub> N@I <sub>h</sub> -C <sub>80</sub> | -7.13 HOMO                                              | -7.48 HOMO-4                   |
| [11]CPP $\supset$ D <sub>2d</sub> -C <sub>84</sub>                  | -7.59 HOMO-1                                            | -7.43 HOMO                     |



**Table S3.** Hirshfeld spin density ( $\rho$ , a.u.) and ionization potential (IP, eV) of fullerene and CPP fragments of  $[n]$ CPP $\supset$ fullerene ions calculated at the  $\omega$ B97M-V/def2-TZVPP level.

| Complex                                                             | $\rho$ on fullerene fragment | $\rho$ on CPP fragment | IP of fullerene fragment | IP of CPP fragment |
|---------------------------------------------------------------------|------------------------------|------------------------|--------------------------|--------------------|
| $([11]\text{CPP}\supset\text{Sc}_3\text{N}@I_h\text{-C}_{80})^{++}$ | 0.995                        | 0.005                  | -7.06                    | -7.08              |
| $([11]\text{CPP}\supset\text{Y}_3\text{N}@I_h\text{-C}_{80})^{++}$  | 0.994                        | 0.006                  | -7.12                    | -6.88              |
| $([11]\text{CPP}\supset\text{Lu}_3\text{N}@I_h\text{-C}_{80})^{++}$ | 0.994                        | 0.006                  | -7.10                    | -6.88              |
| $([11]\text{CPP}\supset I_h\text{-C}_{80})^{++}$                    | 0.972                        | 0.028                  | -6.69                    | -7.04              |
| $([11]\text{CPP}\supset D_{2d}\text{-C}_{84})^{++}$                 | 0.976                        | 0.024                  | -7.50                    | -6.90              |
| $([11]\text{CPP}\supset C_{2v}\text{-C}_{78})^{++}$                 | 0.988                        | 0.012                  | -7.13                    | -6.92              |
| $([11]\text{CPP}\supset D_2\text{-C}_{76})^{++}$                    | 0.985                        | 0.015                  | -7.30                    | -7.02              |
|                                                                     |                              |                        |                          |                    |
| $([10]\text{CPP}\supset\text{Sc}_3\text{N}@I_h\text{-C}_{80})^{++}$ | 0.979                        | 0.021                  | -7.07                    | -6.91              |
| $([10]\text{CPP}\supset\text{Y}_3\text{N}@I_h\text{-C}_{80})^{++}$  | 0.983                        | 0.017                  | -7.10                    | -6.80              |
| $([10]\text{CPP}\supset\text{Lu}_3\text{N}@I_h\text{-C}_{80})^{++}$ | 0.982                        | 0.018                  | -7.10                    | -6.80              |
| $([10]\text{CPP}\supset I_h\text{-C}_{80})^{++}$                    | 0.977                        | 0.023                  | -6.65                    | -6.80              |
| $([10]\text{CPP}\supset D_{2d}\text{-C}_{84})^{++}$                 | 0.946                        | 0.054                  | -7.49                    | -6.93              |
| $([10]\text{CPP}\supset C_{2v}\text{-C}_{78})^{++}$                 | 0.977                        | 0.023                  | -7.13                    | -6.90              |
| $([10]\text{CPP}\supset D_2\text{-C}_{76})^{++}$                    | 0.984                        | 0.016                  | -7.30                    | -6.89              |
|                                                                     |                              |                        |                          |                    |
| $([12]\text{CPP}\supset\text{Sc}_3\text{N}@I_h\text{-C}_{80})^{++}$ | 0.993                        | 0.007                  | -7.06                    | -6.97              |
| $([12]\text{CPP}\supset\text{Y}_3\text{N}@I_h\text{-C}_{80})^{++}$  | 0.995                        | 0.005                  | -7.11                    | -7.10              |
| $([12]\text{CPP}\supset\text{Lu}_3\text{N}@I_h\text{-C}_{80})^{++}$ | 0.995                        | 0.005                  | -7.10                    | -6.98              |
| $([12]\text{CPP}\supset I_h\text{-C}_{80})^{++}$                    | 0.971                        | 0.029                  | -6.64                    | -6.94              |
| $([12]\text{CPP}\supset D_{2d}\text{-C}_{84})^{++}$                 | 0.967                        | 0.033                  | -7.49                    | -6.97              |
| $([12]\text{CPP}\supset C_{2v}\text{-C}_{78})^{++}$                 | 0.970                        | 0.030                  | -7.12                    | -7.09              |
| $([12]\text{CPP}\supset D_2\text{-C}_{76})^{++}$                    | 0.988                        | 0.012                  | -7.30                    | -6.93              |

**Table S4.** Energies ( $\Delta E_{\text{frag}}$ , in kcal/mol) for fragmentation of [10]CPP $\supset$ fullerene ions calculated at the  $\omega$ B97M-V/def2-TZVPP level and experimental ratio of signals.

| Complex                                                                              | $\Delta E_{\text{frag}}$<br>(channel 1) | $\Delta E_{\text{frag}}$<br>(channel 2) | Difference <sup>a</sup> | Experimental<br>ratio of ions<br>(CPP:fullerene) |
|--------------------------------------------------------------------------------------|-----------------------------------------|-----------------------------------------|-------------------------|--------------------------------------------------|
| ([10]CPP $\supset$ Sc <sub>3</sub> N@I <sub>h</sub> -C <sub>80</sub> ) <sup>++</sup> | 63.54                                   | 67.15                                   | 3.61                    | 25:75                                            |
| ([10]CPP $\supset$ Y <sub>3</sub> N@I <sub>h</sub> -C <sub>80</sub> ) <sup>++</sup>  | 64.25                                   | 71.24                                   | 6.99                    | 42:58                                            |
| ([10]CPP $\supset$ Lu <sub>3</sub> N@I <sub>h</sub> -C <sub>80</sub> ) <sup>++</sup> | 67.07                                   | 73.85                                   | 6.78                    | 54:46                                            |
| ([10]CPP $\supset$ D <sub>2d</sub> -C <sub>84</sub> ) <sup>++</sup>                  | 51.18                                   | 64.12                                   | 12.94                   | 100:0                                            |

<sup>a</sup> – Difference =  $\Delta E_{\text{frag}}(\text{channel 2}) - \Delta E_{\text{frag}}(\text{channel 1})$

**Table S5.** Energies ( $\Delta E_{\text{frag}}$ , in kcal/mol) for fragmentation of [12]CPP $\supset$ fullerene ions calculated at the  $\omega$ B97M-V/def2-TZVPP level and experimental ratio of signals.

| Complex                                                                              | $\Delta E_{\text{frag}}$<br>(channel 1) | $\Delta E_{\text{frag}}$<br>(channel 2) | Difference <sup>a</sup> | Experimental<br>ratio of ions<br>(CPP:fullerene) |
|--------------------------------------------------------------------------------------|-----------------------------------------|-----------------------------------------|-------------------------|--------------------------------------------------|
| ([12]CPP $\supset$ Sc <sub>3</sub> N@I <sub>h</sub> -C <sub>80</sub> ) <sup>++</sup> | 54.31                                   | 56.41                                   | 2.10                    | 13:87                                            |
| ([12]CPP $\supset$ Y <sub>3</sub> N@I <sub>h</sub> -C <sub>80</sub> ) <sup>++</sup>  | 56.04                                   | 56.32                                   | 0.28                    | 28:72                                            |
| ([12]CPP $\supset$ Lu <sub>3</sub> N@I <sub>h</sub> -C <sub>80</sub> ) <sup>++</sup> | 56.81                                   | 59.65                                   | 2.84                    | 44:56                                            |
| ([12]CPP $\supset$ D <sub>2d</sub> -C <sub>84</sub> ) <sup>++</sup>                  | 45.16                                   | 57.22                                   | 12.06                   | 100:0                                            |

<sup>a</sup> – Difference =  $\Delta E_{\text{frag}}(\text{channel 2}) - \Delta E_{\text{frag}}(\text{channel 1})$

**Table S6.** BSSE-corrected binding energies ( $\Delta E_{\text{binding}}$ , in kcal/mol) for neutral [11]CPP $\supset$ fullerene complexes calculated at the  $\omega$ B97M-V/def2-TZVPP level.

| Complex                                                             | $\Delta E_{\text{binding}}$ | BSSE correction | $\Delta E_{\text{binding}}$<br>BSSE corrected |
|---------------------------------------------------------------------|-----------------------------|-----------------|-----------------------------------------------|
| [11]CPP $\supset$ Sc <sub>3</sub> N@I <sub>h</sub> -C <sub>80</sub> | -63.573                     | 1.760           | -61.813                                       |
| [11]CPP $\supset$ Y <sub>3</sub> N@I <sub>h</sub> -C <sub>80</sub>  | -64.482                     | 1.799           | -62.683                                       |
| [11]CPP $\supset$ Lu <sub>3</sub> N@I <sub>h</sub> -C <sub>80</sub> | -64.227                     | 1.974           | -62.253                                       |
| [11]CPP $\supset$ Gd <sub>3</sub> N@I <sub>h</sub> -C <sub>80</sub> | -62.162                     | 4.002           | -58.160                                       |
| [11]CPP $\supset$ I <sub>h</sub> -C <sub>80</sub> <sup>*</sup>      | -59.497                     | 1.629           | -57.868                                       |
| [11]CPP $\supset$ D <sub>2d</sub> -C <sub>84</sub>                  | -62.929                     | 1.641           | -61.288                                       |
| [11]CPP $\supset$ C <sub>2v</sub> -C <sub>78</sub>                  | -60.928                     | 1.611           | -59.317                                       |
| [11]CPP $\supset$ D <sub>2</sub> -C <sub>76</sub>                   | -58.115                     | 1.664           | -56.451                                       |

\* hypothetical structure, not observed experimentally

**Table S7.** Energies ( $\Delta E_{\text{frag}}$ , in kcal/mol) for fragmentation of [11]CPP $\supset$ Sc<sub>3</sub>N@fullerene ions calculated at the  $\omega$ B97M-V/def2-TZVPP level and experimental ratio of signals.

| Complex                                                                               | $\Delta E_{\text{frag}}$<br>(channel 1) | $\Delta E_{\text{frag}}$<br>(channel 2) | Difference <sup>a</sup> | Experimental<br>ratio of ions<br>(CPP:fullerene) |
|---------------------------------------------------------------------------------------|-----------------------------------------|-----------------------------------------|-------------------------|--------------------------------------------------|
| ([11]CPP $\supset$ Sc <sub>3</sub> N@I <sub>h</sub> -C <sub>80</sub> ) <sup>++</sup>  | 67.93                                   | 67.60                                   | -0.33                   | 24:76                                            |
| ([11]CPP $\supset$ Sc <sub>3</sub> N@D <sub>5h</sub> -C <sub>80</sub> ) <sup>++</sup> | 83.45                                   | 72.13                                   | -11.32                  | 2:98                                             |
| ([11]CPP $\supset$ Sc <sub>3</sub> N@D <sub>3h</sub> -C <sub>78</sub> ) <sup>++</sup> | 83.76                                   | 69.03                                   | -14.74                  | 0:100                                            |

<sup>a</sup> – Difference =  $\Delta E_{\text{frag}}$ (channel 2) -  $\Delta E_{\text{frag}}$ (channel 1)

**Table S8.** Energies ( $\Delta E_{\text{frag}}$ , in kcal/mol) for fragmentation of hypothetical  $[n]\text{CPP}\supset I_h\text{-C}_{80}$  ions calculated at the  $\omega\text{B97M-V/def2-TZVPP}$  level.

| Complex                                         | $\Delta E_{\text{frag}}$<br>(pathway 1) | $\Delta E_{\text{frag}}$<br>(pathway 2) | Difference <sup>a</sup> |
|-------------------------------------------------|-----------------------------------------|-----------------------------------------|-------------------------|
| $([10]\text{CPP}\supset I_h\text{-C}_{80})^{+}$ | 74.43                                   | 71.06                                   | -3.37                   |
| $([11]\text{CPP}\supset I_h\text{-C}_{80})^{+}$ | 78.08                                   | 70.00                                   | -8.09                   |
| $([12]\text{CPP}\supset I_h\text{-C}_{80})^{+}$ | 63.15                                   | 56.27                                   | -6.87                   |

<sup>a</sup> – Difference =  $\Delta E_{\text{frag}}(\text{channel 2}) - \Delta E_{\text{frag}}(\text{channel 1})$

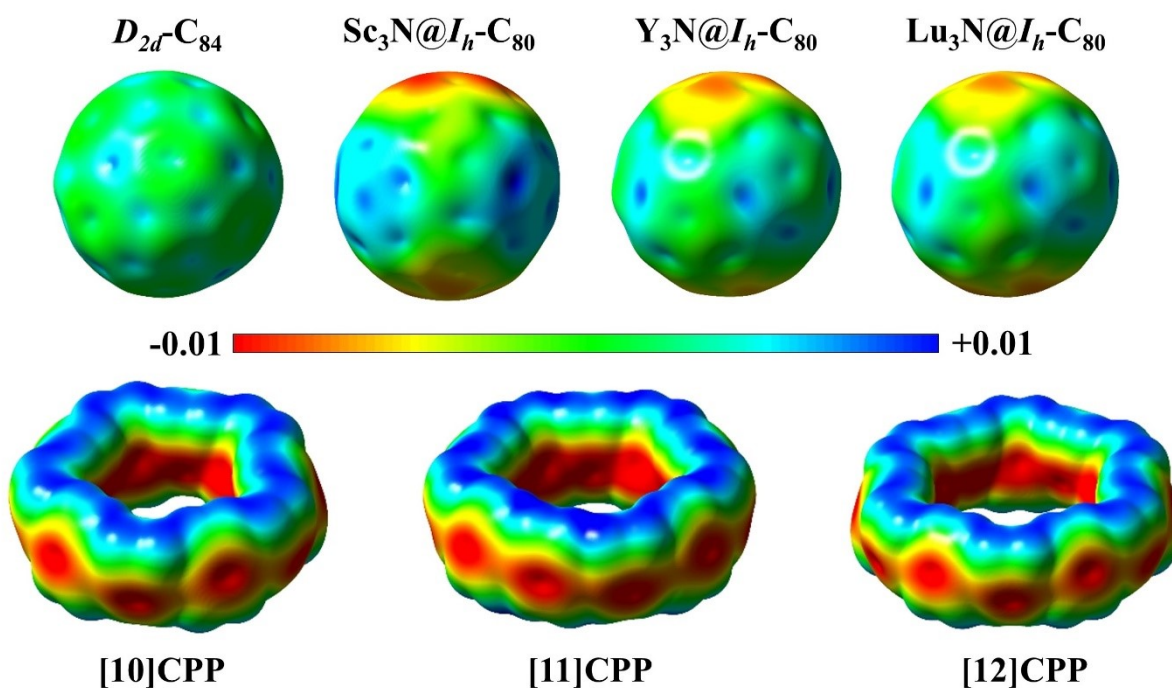

**Figure S12.** Molecular electrostatic potential (MEP) of fullerenes and CPPs mapped on 0.0001 a.u. isosurfaces of the electron density.

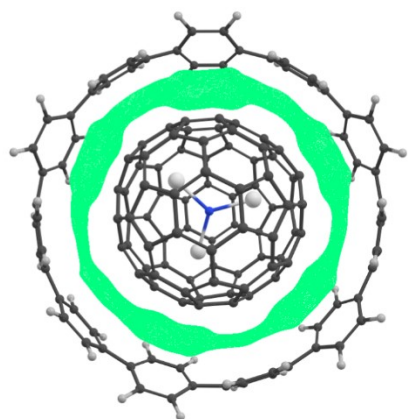

[11]CPP⊃Sc<sub>3</sub>N@I<sub>h</sub>-C<sub>80</sub>

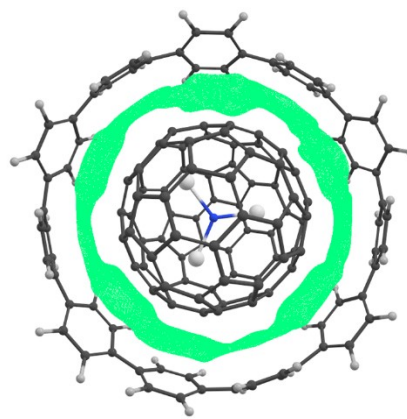

[11]CPP⊃Sc<sub>3</sub>N@D<sub>5h</sub>-C<sub>80</sub>

**Figure S13.** NCI isosurfaces of van der Waals interactions for [11]CPP⊃Sc<sub>3</sub>N@I<sub>h</sub>-C<sub>80</sub> and [11]CPP⊃Sc<sub>3</sub>N@D<sub>5h</sub>-C<sub>80</sub> complexes. Isosurfaces were generated for RDG = 0.5 a.u.

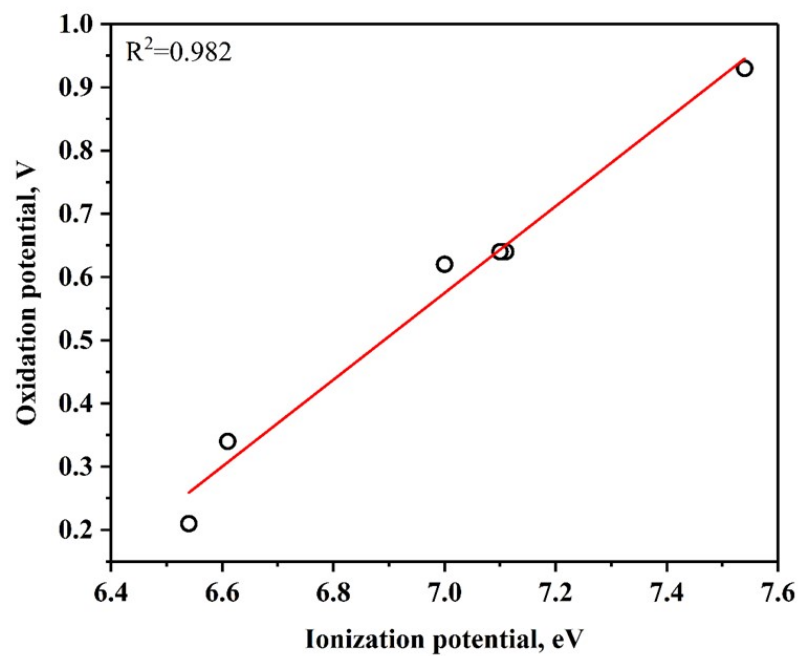

**Figure S14.** Correlation between experimentally measured oxidation potential and calculated IPs of EMFs.

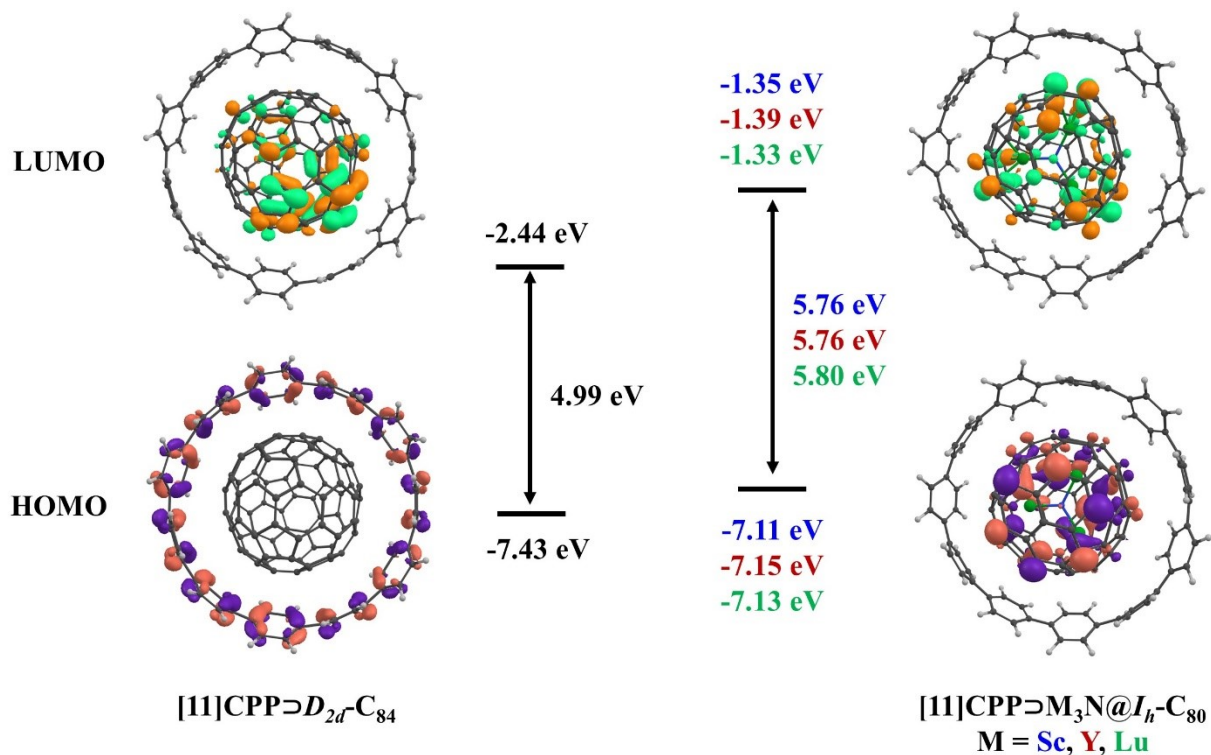

**Figure S15.** HOMO and LUMO of complexes formed by [11]CPP with EMFs and pristine  $C_{84}$  fullerene at the  $\omega$ B97M-V/def2-TZVPP level. Color scheme for fullerenes:  $C_{84}$  – black,  $Sc_3N@I_h$ - $C_{80}$  – blue,  $Y_3N@I_h$ - $C_{80}$  – red,  $Lu_3N@I_h$ - $C_{80}$  – green.

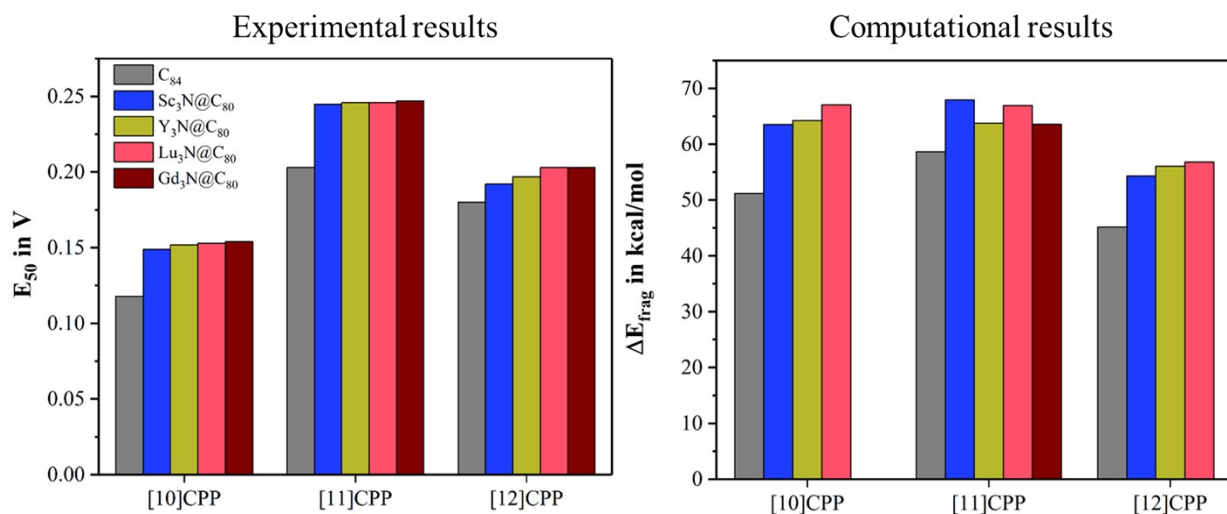

**Figure S16.** Histograms for experimental ( $E_{50}$ ) and computational ( $\Delta E_{\text{frag}}$ ) results of  $C_{84}$  fullerene and  $M_3N@I_h$ - $C_{80}$  with [n]CPPs ( $n=10, 11, 12$ ).

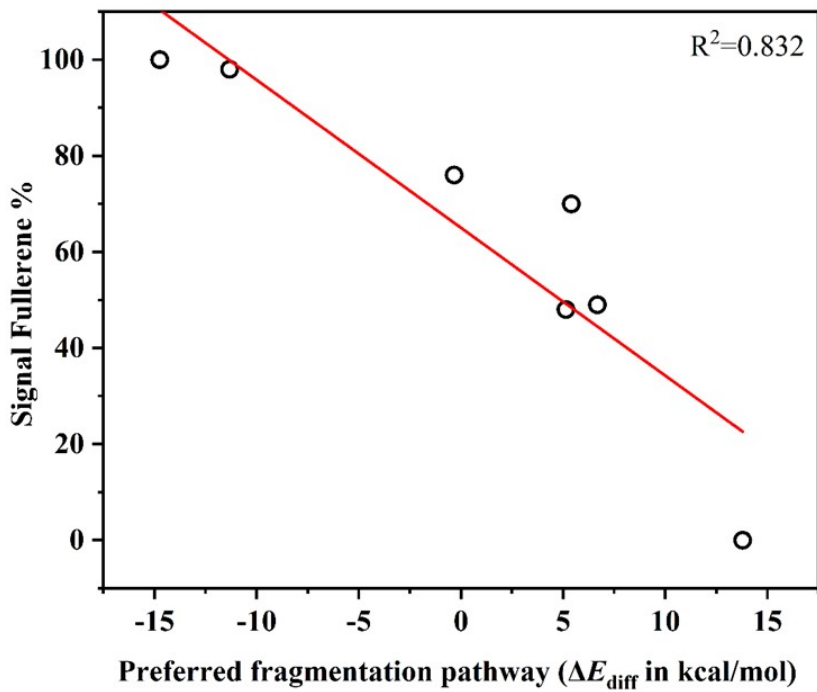

**Figure S17.** Correlation between the intensity of the fullerene signal in MS<sup>2</sup> spectra and preferred fragmentation pathway ( $\Delta E_{\text{diff}}$ ) of [11]CPP⊃fullerene complexes.

### 3.3 Cartesian coordinates

Coordinates for [11]CPP $\supset$ fullerene complexes optimized at BLYP-D3(BJ)/def2-SVP in the form of radical cations (charge +1, multiplicity 2 for all complexes except for ([11]CPP $\supset$ Gd<sub>3</sub>N@C<sub>80</sub>)<sup>+</sup> with charge +1, multiplicity 7).

| ([11]CPP $\supset$ Sc <sub>3</sub> N@I <sub>h</sub> -C <sub>80</sub> ) <sup>+</sup> |              |               |              | ([11]CPP $\supset$ Y <sub>3</sub> N@I <sub>h</sub> -C <sub>80</sub> ) <sup>+</sup> |              |              |              |
|-------------------------------------------------------------------------------------|--------------|---------------|--------------|------------------------------------------------------------------------------------|--------------|--------------|--------------|
| 6                                                                                   | 26.314471000 | -25.029031000 | -6.636552000 | 6                                                                                  | 7.596094000  | -1.388237000 | -2.265878000 |
| 6                                                                                   | 26.540296000 | -23.651433000 | -6.532897000 | 6                                                                                  | 7.944225000  | -0.368643000 | -1.381090000 |
| 6                                                                                   | 26.295464000 | -22.960613000 | -5.319427000 | 6                                                                                  | 7.779758000  | -0.527416000 | 0.023289000  |
| 6                                                                                   | 25.970066000 | -23.736973000 | -4.179109000 | 6                                                                                  | 7.443962000  | -1.824905000 | 0.495146000  |
| 6                                                                                   | 25.743802000 | -25.111877000 | -4.282700000 | 6                                                                                  | 7.097746000  | -2.845630000 | -0.389630000 |
| 6                                                                                   | 25.833383000 | -25.776046000 | -5.531600000 | 6                                                                                  | 7.068852000  | -2.622308000 | -1.792660000 |
| 6                                                                                   | 26.105647000 | -21.491660000 | -5.267574000 | 6                                                                                  | 7.686574000  | 0.629403000  | 0.932633000  |
| 6                                                                                   | 25.525814000 | -20.827293000 | -6.377143000 | 6                                                                                  | 7.282477000  | 1.892942000  | 0.422279000  |
| 6                                                                                   | 24.953639000 | -19.558851000 | -6.238499000 | 6                                                                                  | 6.799526000  | 2.890808000  | 1.267342000  |
| 6                                                                                   | 24.936917000 | -18.898942000 | -4.984436000 | 6                                                                                  | 6.689216000  | 2.676562000  | 2.667876000  |
| 6                                                                                   | 25.664544000 | -19.490471000 | -3.920834000 | 6                                                                                  | 7.258779000  | 1.483333000  | 3.193243000  |
| 6                                                                                   | 26.237929000 | -20.758967000 | -4.060288000 | 6                                                                                  | 7.747356000  | 0.487483000  | 2.347876000  |
| 6                                                                                   | 23.967289000 | -17.801155000 | -4.761965000 | 6                                                                                  | 5.801415000  | 3.541145000  | 3.464554000  |
| 6                                                                                   | 23.566100000 | -16.916216000 | -5.794558000 | 6                                                                                  | 5.480254000  | 4.867442000  | 3.062777000  |
| 6                                                                                   | 22.381237000 | -16.179324000 | -5.691557000 | 6                                                                                  | 4.358511000  | 5.520587000  | 3.569552000  |
| 6                                                                                   | 21.531561000 | -16.304475000 | -4.560614000 | 6                                                                                  | 3.487831000  | 4.881577000  | 4.498330000  |
| 6                                                                                   | 22.027148000 | -17.056771000 | -3.465561000 | 6                                                                                  | 3.919434000  | 3.635740000  | 5.031576000  |
| 6                                                                                   | 23.216443000 | -17.783240000 | -3.561244000 | 6                                                                                  | 5.046244000  | 2.985001000  | 4.531897000  |
| 6                                                                                   | 20.105864000 | -15.893676000 | -4.596203000 | 6                                                                                  | 2.114065000  | 5.364043000  | 4.733816000  |
| 6                                                                                   | 19.444904000 | -15.661550000 | -5.830536000 | 6                                                                                  | 1.510599000  | 6.306681000  | 3.854254000  |
| 6                                                                                   | 18.049968000 | -15.639314000 | -5.917949000 | 6                                                                                  | 0.131350000  | 6.504085000  | 3.835435000  |
| 6                                                                                   | 17.237285000 | -15.871367000 | -4.779163000 | 6                                                                                  | -0.733162000 | 5.763240000  | 4.687886000  |
| 6                                                                                   | 17.897027000 | -15.941288000 | -3.525854000 | 6                                                                                  | -0.112870000 | 4.956481000  | 5.683062000  |
| 6                                                                                   | 19.291263000 | -15.939531000 | -3.436043000 | 6                                                                                  | 1.267065000  | 4.766458000  | 5.708144000  |
| 6                                                                                   | 15.813907000 | -16.269752000 | -4.900172000 | 6                                                                                  | -2.178397000 | 5.648596000  | 4.418656000  |
| 6                                                                                   | 15.334966000 | -16.832094000 | -6.110271000 | 6                                                                                  | -2.708998000 | 6.020580000  | 3.152942000  |
| 6                                                                                   | 14.147106000 | -17.567342000 | -6.147762000 | 6                                                                                  | -3.955370000 | 5.563099000  | 2.728076000  |
| 6                                                                                   | 13.383401000 | -17.783774000 | -4.974545000 | 6                                                                                  | -4.741370000 | 4.705480000  | 3.545019000  |
| 6                                                                                   | 13.767312000 | -17.075357000 | -3.807894000 | 6                                                                                  | -4.299996000 | 4.501853000  | 4.882343000  |
| 6                                                                                   | 14.950813000 | -16.330690000 | -3.774132000 | 6                                                                                  | -3.055549000 | 4.962503000  | 5.307014000  |
| 6                                                                                   | 12.425209000 | -18.913200000 | -4.934670000 | 6                                                                                  | -5.798283000 | 3.879126000  | 2.936129000  |
| 6                                                                                   | 11.731686000 | -19.358343000 | -6.088894000 | 6                                                                                  | -6.418766000 | 4.227995000  | 1.703799000  |
| 6                                                                                   | 11.165012000 | -20.636589000 | -6.140064000 | 6                                                                                  | -7.086008000 | 3.271733000  | 0.939310000  |
| 6                                                                                   | 11.267726000 | -21.526807000 | -5.040438000 | 6                                                                                  | -7.169240000 | 1.915976000  | 1.365596000  |
| 6                                                                                   | 11.818677000 | -21.019144000 | -3.837485000 | 6                                                                                  | -6.712702000 | 1.618801000  | 2.678320000  |
| 6                                                                                   | 12.384223000 | -19.741439000 | -3.785458000 | 6                                                                                  | -6.046634000 | 2.574748000  | 3.443311000  |
| 6                                                                                   | 11.060230000 | -22.987278000 | -5.186921000 | 6                                                                                  | -7.486471000 | 0.818888000  | 0.433246000  |
| 6                                                                                   | 11.376162000 | -23.615488000 | -6.416796000 | 6                                                                                  | -7.253402000 | 0.979865000  | -0.959152000 |
| 6                                                                                   | 11.564413000 | -24.998529000 | -6.493227000 | 6                                                                                  | -7.173864000 | -0.122449000 | -1.809491000 |
| 6                                                                                   | 11.443449000 | -25.818738000 | -5.344098000 | 6                                                                                  | -7.321396000 | -1.446256000 | -1.312831000 |
| 6                                                                                   | 10.970999000 | -25.209906000 | -4.153553000 | 6                                                                                  | -7.724895000 | -1.592180000 | 0.043640000  |
| 6                                                                                   | 10.784185000 | -23.825557000 | -4.076548000 | 6                                                                                  | -7.807218000 | -0.489346000 | 0.892631000  |
| 6                                                                                   | 12.038326000 | -27.176582000 | -5.354135000 | 6                                                                                  | -6.849060000 | -2.588692000 | -2.115877000 |



|   |              |               |              |   |              |              |              |
|---|--------------|---------------|--------------|---|--------------|--------------|--------------|
| 6 | 12.168636000 | -27.934530000 | -6.546317000 | 6 | -6.726130000 | -2.514658000 | -3.531381000 |
| 6 | 13.064396000 | -29.006331000 | -6.625899000 | 6 | -5.934279000 | -3.422713000 | -4.232954000 |
| 6 | 13.871485000 | -29.369343000 | -5.516695000 | 6 | -5.221547000 | -4.451178000 | -3.555804000 |
| 6 | 13.612745000 | -28.720421000 | -4.283543000 | 6 | -5.494425000 | -4.632328000 | -2.172912000 |
| 6 | 12.717946000 | -27.648960000 | -4.204047000 | 6 | -6.286393000 | -3.723845000 | -1.471147000 |
| 6 | 15.106054000 | -30.176612000 | -5.668252000 | 6 | -4.061241000 | -5.126842000 | -4.164417000 |
| 6 | 15.844020000 | -30.097629000 | -6.875533000 | 6 | -3.301517000 | -4.447404000 | -5.154696000 |
| 6 | 17.190008000 | -30.472459000 | -6.924937000 | 6 | -1.991839000 | -4.827077000 | -5.443171000 |
| 6 | 17.860563000 | -30.945094000 | -5.769729000 | 6 | -1.374633000 | -5.909964000 | -4.760599000 |
| 6 | 17.074064000 | -31.193489000 | -4.615516000 | 6 | -2.199767000 | -6.703359000 | -3.915528000 |
| 6 | 15.727087000 | -30.818326000 | -4.566189000 | 6 | -3.509264000 | -6.320797000 | -3.623730000 |
| 6 | 19.341982000 | -30.913637000 | -5.722657000 | 6 | 0.095279000  | -6.022660000 | -4.751921000 |
| 6 | 20.137215000 | -31.025578000 | -6.891498000 | 6 | 0.902425000  | -5.437430000 | -5.766769000 |
| 6 | 21.472434000 | -30.606608000 | -6.898995000 | 6 | 2.261612000  | -5.203927000 | -5.559498000 |
| 6 | 22.073304000 | -30.059665000 | -5.736913000 | 6 | 2.885924000  | -5.550962000 | -4.330017000 |
| 6 | 21.324459000 | -30.094960000 | -4.534079000 | 6 | 2.116142000  | -6.285838000 | -3.388743000 |
| 6 | 19.990168000 | -30.512822000 | -4.527313000 | 6 | 0.756360000  | -6.514883000 | -3.594082000 |
| 6 | 23.316271000 | -29.255086000 | -5.793324000 | 6 | 4.190272000  | -4.994293000 | -3.929326000 |
| 6 | 23.574363000 | -28.455140000 | -6.933959000 | 6 | 4.599079000  | -3.725432000 | -4.421046000 |
| 6 | 24.493396000 | -27.402985000 | -6.883588000 | 6 | 5.626525000  | -3.012266000 | -3.803720000 |
| 6 | 25.199111000 | -27.106030000 | -5.691023000 | 6 | 6.299006000  | -3.529998000 | -2.663141000 |
| 6 | 25.060034000 | -28.007796000 | -4.605255000 | 6 | 6.002057000  | -4.867502000 | -2.281267000 |
| 6 | 24.137427000 | -29.058124000 | -4.654621000 | 6 | 4.972783000  | -5.579760000 | -2.896310000 |
| 1 | 26.467422000 | -25.528108000 | -7.603426000 | 1 | 7.690270000  | -1.213898000 | -3.345826000 |
| 1 | 26.865624000 | -23.090761000 | -7.420250000 | 1 | 8.303985000  | 0.587057000  | -1.784168000 |
| 1 | 25.764198000 | -23.236947000 | -3.223831000 | 1 | 7.322593000  | -2.000627000 | 1.571220000  |
| 1 | 25.367181000 | -25.653850000 | -3.405665000 | 1 | 6.717596000  | -3.789232000 | 0.020970000  |
| 1 | 25.402135000 | -21.364074000 | -7.326735000 | 1 | 7.226763000  | 2.051841000  | -0.661506000 |
| 1 | 24.395822000 | -19.130852000 | -7.082002000 | 1 | 6.379730000  | 3.800693000  | 0.820900000  |
| 1 | 25.735584000 | -18.967736000 | -2.956715000 | 1 | 7.280141000  | 1.322252000  | 4.279321000  |
| 1 | 26.753028000 | -21.214610000 | -3.203250000 | 1 | 8.145073000  | -0.436885000 | 2.786903000  |
| 1 | 24.167695000 | -16.844219000 | -6.711572000 | 1 | 6.100147000  | 5.374398000  | 2.311506000  |
| 1 | 22.084174000 | -15.538803000 | -6.532387000 | 1 | 4.126697000  | 6.528145000  | 3.202611000  |
| 1 | 21.416036000 | -17.182843000 | -2.564382000 | 1 | 3.302481000  | 3.108489000  | 5.768285000  |
| 1 | 23.494472000 | -18.453973000 | -2.737684000 | 1 | 5.267684000  | 1.970061000  | 4.885541000  |
| 1 | 20.026657000 | -15.584181000 | -6.757727000 | 1 | 2.120500000  | 6.834812000  | 3.111711000  |
| 1 | 17.586272000 | -15.508510000 | -6.904496000 | 1 | -0.286575000 | 7.201787000  | 3.099564000  |
| 1 | 17.314981000 | -16.096930000 | -2.608683000 | 1 | -0.727234000 | 4.397735000  | 6.399101000  |
| 1 | 19.750358000 | -16.052517000 | -2.445975000 | 1 | 1.687480000  | 4.091377000  | 6.463344000  |
| 1 | 15.961505000 | -16.809405000 | -7.010415000 | 1 | -2.089497000 | 6.572561000  | 2.436714000  |
| 1 | 13.882276000 | -18.097705000 | -7.071744000 | 1 | -4.265070000 | 5.768236000  | 1.695754000  |
| 1 | 13.153931000 | -17.153397000 | -2.899384000 | 1 | -4.925251000 | 3.932993000  | 5.582935000  |
| 1 | 15.237454000 | -15.832029000 | -2.838674000 | 1 | -2.736277000 | 4.743178000  | 6.333471000  |
| 1 | 11.679457000 | -18.708985000 | -6.973992000 | 1 | -6.336787000 | 5.254571000  | 1.322910000  |
| 1 | 10.673694000 | -20.970881000 | -7.064331000 | 1 | -7.517232000 | 3.567445000  | -0.025993000 |
| 1 | 11.923534000 | -21.679815000 | -2.967378000 | 1 | -6.769200000 | 0.591228000  | 3.057302000  |
| 1 | 12.921129000 | -19.435902000 | -2.877687000 | 1 | -5.598917000 | 2.265419000  | 4.395769000  |
| 1 | 11.608612000 | -23.000888000 | -7.296280000 | 1 | -7.007934000 | 1.970723000  | -1.360775000 |
| 1 | 11.939086000 | -25.430325000 | -7.430373000 | 1 | -6.871261000 | 0.038548000  | -2.851610000 |
| 1 | 10.793525000 | -25.826638000 | -3.261694000 | 1 | -7.942827000 | -2.591450000 | 0.443019000  |
| 1 | 10.462309000 | -23.378702000 | -3.125762000 | 1 | -8.089141000 | -0.645686000 | 1.941995000  |
| 1 | 11.593344000 | -27.647680000 | -7.437425000 | 1 | -7.230312000 | -1.708732000 | -4.080796000 |

|    |              |               |              |    |              |              |              |
|----|--------------|---------------|--------------|----|--------------|--------------|--------------|
| 1  | 13.177339000 | -29.541700000 | -7.578782000 | 1  | -5.828718000 | -3.311701000 | -5.320244000 |
| 1  | 14.218231000 | -28.968863000 | -3.402295000 | 1  | -4.974363000 | -5.419834000 | -1.613577000 |
| 1  | 12.647704000 | -27.087286000 | -3.263684000 | 1  | -6.367243000 | -3.828189000 | -0.382054000 |
| 1  | 15.400969000 | -29.606795000 | -7.751783000 | 1  | -3.693856000 | -3.528498000 | -5.607440000 |
| 1  | 17.763568000 | -30.263344000 | -7.837323000 | 1  | -1.397624000 | -4.195317000 | -6.114727000 |
| 1  | 17.540808000 | -31.639004000 | -3.726112000 | 1  | -1.789727000 | -7.607274000 | -3.446100000 |
| 1  | 15.159582000 | -30.974669000 | -3.638394000 | 1  | -4.102517000 | -6.929639000 | -2.928588000 |
| 1  | 19.687430000 | -31.403937000 | -7.819882000 | 1  | 0.445561000  | -5.126539000 | -6.715442000 |
| 1  | 22.049532000 | -30.662468000 | -7.832457000 | 1  | 2.848049000  | -4.714679000 | -6.348467000 |
| 1  | 21.751523000 | -29.669525000 | -3.616790000 | 1  | 2.559915000  | -6.573851000 | -2.427816000 |
| 1  | 19.407846000 | -30.406480000 | -3.603021000 | 1  | 0.173210000  | -6.974777000 | -2.786909000 |
| 1  | 22.952034000 | -28.571672000 | -7.830456000 | 1  | 4.023841000  | -3.239346000 | -5.218919000 |
| 1  | 24.568144000 | -26.724148000 | -7.742903000 | 1  | 5.829134000  | -1.987037000 | -4.136839000 |
| 1  | 25.650466000 | -27.852650000 | -3.691756000 | 1  | 6.563881000  | -5.339064000 | -1.464305000 |
| 1  | 24.015318000 | -29.710094000 | -3.778600000 | 1  | 4.745502000  | -6.597385000 | -2.552210000 |
| 21 | 20.693690000 | -23.238113000 | -5.068686000 | 39 | -0.968776000 | -1.457345000 | -1.196850000 |
| 21 | 17.795073000 | -25.212091000 | -5.254077000 | 39 | 2.107328000  | 0.016725000  | -0.191603000 |
| 21 | 17.560825000 | -21.712936000 | -5.480233000 | 39 | -0.916612000 | 0.892517000  | 1.486718000  |
| 7  | 18.682817000 | -23.388208000 | -5.275912000 | 7  | 0.075395000  | -0.202205000 | 0.055375000  |
| 6  | 15.424885000 | -21.909667000 | -3.057779000 | 6  | -0.067986000 | 3.907853000  | 0.848619000  |
| 6  | 14.796358000 | -22.326952000 | -4.275843000 | 6  | 0.742541000  | 3.443282000  | 1.933954000  |
| 6  | 15.018271000 | -21.493749000 | -5.445936000 | 6  | 0.042231000  | 2.768327000  | 3.026159000  |
| 6  | 22.218696000 | -22.099057000 | -6.825190000 | 6  | -2.486028000 | -3.441021000 | -0.271191000 |
| 6  | 15.926748000 | -22.869098000 | -2.095328000 | 6  | 0.439398000  | 3.928414000  | -0.511344000 |
| 6  | 16.880605000 | -25.132055000 | -1.884300000 | 6  | 1.998570000  | 2.819326000  | -2.076920000 |
| 6  | 15.820188000 | -24.282317000 | -2.352905000 | 6  | 1.776404000  | 3.476627000  | -0.819185000 |
| 6  | 15.110737000 | -24.699971000 | -3.533824000 | 6  | 2.634362000  | 3.094291000  | 0.271781000  |
| 6  | 14.689383000 | -24.317600000 | -5.814858000 | 6  | 2.768087000  | 1.975339000  | 2.321684000  |
| 6  | 14.980159000 | -23.521131000 | -6.970348000 | 6  | 2.056876000  | 1.224648000  | 3.319538000  |
| 6  | 15.130607000 | -22.100351000 | -6.755545000 | 6  | 0.701258000  | 1.642895000  | 3.661230000  |
| 6  | 15.739640000 | -24.105205000 | -8.035236000 | 6  | 2.382101000  | -0.160607000 | 3.444029000  |
| 6  | 15.254526000 | -25.648661000 | -5.684489000 | 6  | 3.732570000  | 1.347256000  | 1.412596000  |
| 6  | 17.110540000 | -27.162164000 | -6.293426000 | 6  | 4.348529000  | -0.775884000 | 0.226485000  |
| 6  | 16.066727000 | -26.239602000 | -6.720963000 | 6  | 4.030310000  | -0.074578000 | 1.486904000  |
| 6  | 16.291898000 | -25.444924000 | -7.906429000 | 6  | 3.321303000  | -0.805550000 | 2.523558000  |
| 6  | 17.273393000 | -26.322704000 | -2.624882000 | 6  | 2.995887000  | 1.756961000  | -2.218341000 |
| 6  | 16.591146000 | -26.745501000 | -3.826387000 | 6  | 3.905176000  | 1.365183000  | -1.148994000 |
| 6  | 15.515132000 | -25.889576000 | -4.268504000 | 6  | 3.662470000  | 2.053419000  | 0.124090000  |
| 6  | 17.369602000 | -27.427498000 | -4.861067000 | 6  | 4.304114000  | -0.067847000 | -1.095195000 |
| 6  | 18.498201000 | -19.283675000 | -5.682706000 | 6  | -3.472425000 | 0.716409000  | 2.115262000  |
| 6  | 17.822883000 | -19.688830000 | -6.892746000 | 6  | -2.648995000 | 0.290729000  | 3.237108000  |
| 6  | 16.031017000 | -21.298404000 | -7.547717000 | 6  | -0.315228000 | 0.699018000  | 4.077904000  |
| 6  | 16.443163000 | -20.143914000 | -6.757139000 | 6  | -1.644037000 | 1.246518000  | 3.756427000  |
| 6  | 17.869046000 | -19.407109000 | -4.370823000 | 6  | -3.256132000 | 2.009869000  | 1.450902000  |
| 6  | 16.307017000 | -20.743507000 | -3.040085000 | 6  | -1.503462000 | 3.601816000  | 0.807913000  |
| 6  | 16.529208000 | -19.926578000 | -4.211408000 | 6  | -2.214383000 | 2.939700000  | 1.891388000  |
| 6  | 15.794495000 | -20.258112000 | -5.431451000 | 6  | -1.424592000 | 2.576602000  | 3.094243000  |
| 6  | 19.784456000 | -21.293066000 | -1.760478000 | 6  | -2.722222000 | 1.847698000  | -2.287305000 |
| 6  | 18.687602000 | -20.497781000 | -2.249753000 | 6  | -2.876552000 | 2.509220000  | -1.013025000 |
| 6  | 18.922432000 | -19.662260000 | -3.398111000 | 6  | -3.583355000 | 1.815679000  | 0.031769000  |
| 6  | 17.354832000 | -21.002243000 | -2.061687000 | 6  | -1.857912000 | 3.434953000  | -0.601242000 |
| 6  | 21.342420000 | -25.469693000 | -2.810202000 | 6  | 0.398023000  | -1.014787000 | -4.022477000 |

|                                                                                               |              |               |              |                                                                                               |              |              |              |
|-----------------------------------------------------------------------------------------------|--------------|---------------|--------------|-----------------------------------------------------------------------------------------------|--------------|--------------|--------------|
| 6                                                                                             | 19.516626000 | -27.042354000 | -3.498315000 | 6                                                                                             | 2.728033000  | -0.585352000 | -3.106822000 |
| 6                                                                                             | 20.861526000 | -26.552608000 | -3.648234000 | 6                                                                                             | 1.683769000  | -1.497490000 | -3.544527000 |
| 6                                                                                             | 18.819961000 | -27.475633000 | -4.698763000 | 6                                                                                             | 3.630993000  | -0.998382000 | -2.033394000 |
| 6                                                                                             | 22.267695000 | -24.668753000 | -3.597949000 | 6                                                                                             | -0.637468000 | -2.007974000 | -3.706545000 |
| 6                                                                                             | 22.775141000 | -22.432622000 | -4.548316000 | 6                                                                                             | -2.768529000 | -2.429278000 | -2.417625000 |
| 6                                                                                             | 22.437067000 | -23.249170000 | -3.382187000 | 6                                                                                             | -2.021880000 | -1.621929000 | -3.414357000 |
| 6                                                                                             | 21.606124000 | -22.666200000 | -2.354127000 | 6                                                                                             | -2.260392000 | -0.186068000 | -3.417906000 |
| 6                                                                                             | 21.919340000 | -24.870820000 | -7.320516000 | 6                                                                                             | 0.187791000  | -4.226920000 | -0.812005000 |
| 6                                                                                             | 22.586215000 | -24.459255000 | -6.107007000 | 6                                                                                             | -0.648839000 | -3.849819000 | -1.938585000 |
| 6                                                                                             | 22.345540000 | -25.260682000 | -4.931555000 | 6                                                                                             | 0.031310000  | -3.103523000 | -2.987264000 |
| 6                                                                                             | 22.839912000 | -23.037604000 | -5.897788000 | 6                                                                                             | -2.073207000 | -3.537834000 | -1.681332000 |
| 6                                                                                             | 19.441324000 | -27.308667000 | -5.993617000 | 6                                                                                             | 3.335375000  | -2.241338000 | -1.347614000 |
| 6                                                                                             | 20.772925000 | -26.774151000 | -6.155050000 | 6                                                                                             | 2.256468000  | -3.135728000 | -1.753582000 |
| 6                                                                                             | 21.476211000 | -26.424447000 | -4.956383000 | 6                                                                                             | 1.458743000  | -2.768573000 | -2.891385000 |
| 6                                                                                             | 21.036134000 | -26.027270000 | -7.347580000 | 6                                                                                             | 1.618286000  | -3.914895000 | -0.741113000 |
| 6                                                                                             | 18.401265000 | -27.081858000 | -6.966033000 | 6                                                                                             | 3.739586000  | -2.099726000 | 0.033583000  |
| 6                                                                                             | 17.564071000 | -25.469187000 | -8.622850000 | 6                                                                                             | 2.851932000  | -2.174758000 | 2.331983000  |
| 6                                                                                             | 18.656003000 | -26.262674000 | -8.138539000 | 6                                                                                             | 3.014127000  | -2.830969000 | 1.065861000  |
| 6                                                                                             | 19.992201000 | -25.773336000 | -8.326808000 | 6                                                                                             | 1.988948000  | -3.757663000 | 0.653279000  |
| 6                                                                                             | 22.098928000 | -21.146578000 | -4.691267000 | 6                                                                                             | -3.562736000 | -1.693725000 | -1.409686000 |
| 6                                                                                             | 21.247671000 | -20.558539000 | -3.669498000 | 6                                                                                             | -3.798925000 | -0.250656000 | -1.428264000 |
| 6                                                                                             | 21.044798000 | -21.321410000 | -2.474553000 | 6                                                                                             | -3.179365000 | 0.484545000  | -2.488171000 |
| 6                                                                                             | 20.188451000 | -19.687699000 | -4.104016000 | 6                                                                                             | -4.020112000 | 0.444974000  | -0.172757000 |
| 6                                                                                             | 19.553422000 | -22.614721000 | -1.206920000 | 6                                                                                             | -1.519297000 | 2.031444000  | -3.073193000 |
| 6                                                                                             | 18.223603000 | -23.156947000 | -1.101076000 | 6                                                                                             | -0.458346000 | 2.894024000  | -2.621528000 |
| 6                                                                                             | 17.122501000 | -22.312734000 | -1.488693000 | 6                                                                                             | -0.664438000 | 3.628753000  | -1.400219000 |
| 6                                                                                             | 18.065820000 | -24.579576000 | -1.260144000 | 6                                                                                             | 0.892698000  | 2.534563000  | -2.968426000 |
| 6                                                                                             | 20.675774000 | -23.459452000 | -1.563680000 | 6                                                                                             | -1.234055000 | 0.794197000  | -3.771057000 |
| 6                                                                                             | 18.713233000 | -26.499373000 | -2.443042000 | 6                                                                                             | 2.466558000  | 0.818186000  | -3.217714000 |
| 6                                                                                             | 20.502684000 | -24.864396000 | -1.809585000 | 6                                                                                             | 0.119206000  | 0.397186000  | -4.039749000 |
| 6                                                                                             | 19.194664000 | -25.427777000 | -1.596121000 | 6                                                                                             | 1.180801000  | 1.306521000  | -3.678540000 |
| 6                                                                                             | 21.801447000 | -20.930231000 | -6.089847000 | 6                                                                                             | -3.417009000 | -2.341438000 | -0.121145000 |
| 6                                                                                             | 20.073720000 | -20.447527000 | -7.764147000 | 6                                                                                             | -2.826836000 | -2.074919000 | 2.265614000  |
| 6                                                                                             | 20.713061000 | -20.089125000 | -6.533446000 | 6                                                                                             | -3.590124000 | -1.632018000 | 1.142366000  |
| 6                                                                                             | 19.932132000 | -19.454385000 | -5.511500000 | 6                                                                                             | -3.939231000 | -0.237078000 | 1.098979000  |
| 6                                                                                             | 21.408206000 | -23.903175000 | -8.288085000 | 6                                                                                             | -0.308235000 | -4.250011000 | 0.561892000  |
| 6                                                                                             | 20.468319000 | -21.635046000 | -8.504585000 | 6                                                                                             | -1.858065000 | -3.146039000 | 2.123057000  |
| 6                                                                                             | 21.516364000 | -22.495591000 | -8.034747000 | 6                                                                                             | -1.641445000 | -3.810566000 | 0.861845000  |
| 6                                                                                             | 14.596854000 | -23.735818000 | -4.489004000 | 6                                                                                             | 2.111070000  | 3.060488000  | 1.628888000  |
| 6                                                                                             | 17.791266000 | -24.156281000 | -9.189035000 | 6                                                                                             | 1.654316000  | -2.367237000 | 3.127370000  |
| 6                                                                                             | 19.282574000 | -22.191733000 | -9.133045000 | 6                                                                                             | -0.755208000 | -2.868633000 | 3.024234000  |
| 6                                                                                             | 19.122225000 | -23.614717000 | -9.288110000 | 6                                                                                             | 0.593280000  | -3.226731000 | 2.674917000  |
| 6                                                                                             | 20.223496000 | -24.460864000 | -8.905926000 | 6                                                                                             | 0.797459000  | -3.962844000 | 1.455670000  |
| 6                                                                                             | 16.664972000 | -23.312564000 | -8.828389000 | 6                                                                                             | 1.363695000  | -1.124917000 | 3.818512000  |
| 6                                                                                             | 18.640188000 | -20.267200000 | -7.934713000 | 6                                                                                             | -2.332131000 | -1.127647000 | 3.267210000  |
| 6                                                                                             | 16.853360000 | -21.912828000 | -8.576663000 | 6                                                                                             | 0.006705000  | -0.725391000 | 4.095175000  |
| 6                                                                                             | 18.156653000 | -21.352095000 | -8.783707000 | 6                                                                                             | -1.042167000 | -1.633052000 | 3.726675000  |
| <b>([11]CPP<math>\supset</math>Lu<sub>3</sub>N@I<sub>h</sub>-C<sub>80</sub>)<sup>++</sup></b> |              |               |              | <b>([11]CPP<math>\supset</math>Gd<sub>3</sub>N@I<sub>h</sub>-C<sub>80</sub>)<sup>++</sup></b> |              |              |              |
| 6                                                                                             | 7.440441000  | -1.216015000  | -2.400553000 | 6                                                                                             | 7.480429000  | -1.580588000 | -2.099097000 |
| 6                                                                                             | 7.777865000  | -0.233214000  | -1.469401000 | 6                                                                                             | 7.786395000  | -0.550282000 | -1.226292000 |
| 6                                                                                             | 7.570702000  | -0.437527000  | -0.076463000 | 6                                                                                             | 7.534935000  | -0.674327000 | 0.157904000  |

|   |              |              |              |   |              |              |              |
|---|--------------|--------------|--------------|---|--------------|--------------|--------------|
| 6 | 7.163898000  | -1.735197000 | 0.336911000  | 6 | 7.113351000  | -1.931714000 | 0.639941000  |
| 6 | 6.829249000  | -2.718239000 | -0.592818000 | 6 | 6.803754000  | -2.960951000 | -0.232885000 |
| 6 | 6.881297000  | -2.457867000 | -1.988926000 | 6 | 6.905200000  | -2.782136000 | -1.629213000 |
| 6 | 7.532051000  | 0.677779000  | 0.887355000  | 6 | 7.486167000  | 0.492286000  | 1.042392000  |
| 6 | 7.215192000  | 1.991854000  | 0.447828000  | 6 | 7.109300000  | 1.749092000  | 0.524274000  |
| 6 | 6.754301000  | 2.958722000  | 1.341473000  | 6 | 6.698177000  | 2.770220000  | 1.365233000  |
| 6 | 6.582635000  | 2.659713000  | 2.720273000  | 6 | 6.639813000  | 2.580145000  | 2.762644000  |
| 6 | 7.099546000  | 1.417630000  | 3.184923000  | 6 | 7.191901000  | 1.388860000  | 3.285589000  |
| 6 | 7.563034000  | 0.453228000  | 2.292379000  | 6 | 7.604219000  | 0.369011000  | 2.445549000  |
| 6 | 5.681639000  | 3.482622000  | 3.546562000  | 6 | 5.800649000  | 3.464333000  | 3.574325000  |
| 6 | 5.336677000  | 4.818264000  | 3.197853000  | 6 | 5.495096000  | 4.786013000  | 3.178367000  |
| 6 | 4.201779000  | 5.430489000  | 3.727846000  | 6 | 4.393308000  | 5.445933000  | 3.693670000  |
| 6 | 3.343502000  | 4.740839000  | 4.631615000  | 6 | 3.529199000  | 4.814321000  | 4.620065000  |
| 6 | 3.793906000  | 3.481044000  | 5.112339000  | 6 | 3.960660000  | 3.582324000  | 5.159964000  |
| 6 | 4.931485000  | 2.871392000  | 4.587985000  | 6 | 5.069438000  | 2.926451000  | 4.654028000  |
| 6 | 1.965207000  | 5.190052000  | 4.898980000  | 6 | 2.153043000  | 5.276838000  | 4.830545000  |
| 6 | 1.324997000  | 6.129814000  | 4.043511000  | 6 | 1.557810000  | 6.207571000  | 3.947781000  |
| 6 | -0.057366000 | 6.302226000  | 4.060913000  | 6 | 0.186468000  | 6.386439000  | 3.905413000  |
| 6 | -0.887736000 | 5.538362000  | 4.927574000  | 6 | -0.675006000 | 5.629418000  | 4.729670000  |
| 6 | -0.229303000 | 4.729521000  | 5.896382000  | 6 | -0.069872000 | 4.822511000  | 5.719812000  |
| 6 | 1.153711000  | 4.564195000  | 5.885140000  | 6 | 1.302568000  | 4.660550000  | 5.776298000  |
| 6 | -2.340699000 | 5.419107000  | 4.704705000  | 6 | -2.107638000 | 5.505258000  | 4.444273000  |
| 6 | -2.919914000 | 5.836307000  | 3.474581000  | 6 | -2.610484000 | 5.825086000  | 3.164547000  |
| 6 | -4.182227000 | 5.396140000  | 3.082645000  | 6 | -3.847016000 | 5.363189000  | 2.745764000  |
| 6 | -4.934994000 | 4.504328000  | 3.894497000  | 6 | -4.639563000 | 4.551804000  | 3.584395000  |
| 6 | -4.442104000 | 4.249055000  | 5.204625000  | 6 | -4.220972000 | 4.391719000  | 4.924552000  |
| 6 | -3.183337000 | 4.698904000  | 5.599943000  | 6 | -2.990136000 | 4.862885000  | 5.345052000  |
| 6 | -6.006540000 | 3.697460000  | 3.285462000  | 6 | -5.713413000 | 3.741045000  | 3.006519000  |
| 6 | -6.661016000 | 4.098255000  | 2.086977000  | 6 | -6.394434000 | 4.128518000  | 1.830911000  |
| 6 | -7.321439000 | 3.169610000  | 1.284580000  | 6 | -7.116956000 | 3.206779000  | 1.092327000  |
| 6 | -7.361707000 | 1.790858000  | 1.637285000  | 6 | -7.183383000 | 1.851903000  | 1.488799000  |
| 6 | -6.885131000 | 1.436189000  | 2.928499000  | 6 | -6.648374000 | 1.510641000  | 2.749504000  |
| 6 | -6.225258000 | 2.365843000  | 3.732225000  | 6 | -5.932750000 | 2.434440000  | 3.492410000  |
| 6 | -7.647473000 | 0.742269000  | 0.641283000  | 6 | -7.542578000 | 0.786613000  | 0.548378000  |
| 6 | -7.395435000 | 0.995579000  | -0.734533000 | 6 | -7.285323000 | 0.963193000  | -0.827652000 |
| 6 | -7.290989000 | -0.047602000 | -1.653065000 | 6 | -7.187847000 | -0.125197000 | -1.678258000 |
| 6 | -7.430423000 | -1.400903000 | -1.244273000 | 6 | -7.346992000 | -1.440446000 | -1.192350000 |
| 6 | -7.842769000 | -1.641415000 | 0.095647000  | 6 | -7.799968000 | -1.597507000 | 0.137290000  |
| 6 | -7.950074000 | -0.597004000 | 1.014116000  | 6 | -7.896566000 | -0.509086000 | 0.987578000  |
| 6 | -6.935147000 | -2.477645000 | -2.120514000 | 6 | -6.824212000 | -2.565717000 | -1.971923000 |
| 6 | -6.828769000 | -2.311116000 | -3.528621000 | 6 | -6.687299000 | -2.498849000 | -3.376707000 |
| 6 | -6.014883000 | -3.147801000 | -4.291991000 | 6 | -5.851581000 | -3.372754000 | -4.050812000 |
| 6 | -5.268600000 | -4.195302000 | -3.685699000 | 6 | -5.115913000 | -4.355687000 | -3.352123000 |
| 6 | -5.514680000 | -4.465265000 | -2.312137000 | 6 | -5.388895000 | -4.529809000 | -1.979198000 |
| 6 | -6.327481000 | -3.627689000 | -1.548787000 | 6 | -6.224589000 | -3.654861000 | -1.304563000 |
| 6 | -4.115288000 | -4.823020000 | -4.355660000 | 6 | -3.955094000 | -5.021192000 | -3.948346000 |
| 6 | -3.367448000 | -4.079170000 | -5.307833000 | 6 | -3.172803000 | -4.332416000 | -4.898851000 |
| 6 | -2.074943000 | -4.462323000 | -5.664310000 | 6 | -1.891217000 | -4.757892000 | -5.207601000 |
| 6 | -1.463697000 | -5.607117000 | -5.085232000 | 6 | -1.332800000 | -5.890402000 | -4.578082000 |
| 6 | -2.280745000 | -6.447010000 | -4.278822000 | 6 | -2.178623000 | -6.671965000 | -3.759634000 |
| 6 | -3.573526000 | -6.064238000 | -3.921981000 | 6 | -3.459732000 | -6.246616000 | -3.450736000 |
| 6 | 0.003980000  | -5.745490000 | -5.119148000 | 6 | 0.119475000  | -6.084571000 | -4.596880000 |

|   |              |              |              |   |              |              |              |
|---|--------------|--------------|--------------|---|--------------|--------------|--------------|
| 6 | 0.801668000  | -5.104975000 | -6.107454000 | 6 | 0.928857000  | -5.572446000 | -5.635450000 |
| 6 | 2.168200000  | -4.904626000 | -5.911224000 | 6 | 2.293454000  | -5.414838000 | -5.460945000 |
| 6 | 2.809221000  | -5.334055000 | -4.716399000 | 6 | 2.912090000  | -5.760540000 | -4.238662000 |
| 6 | 2.045708000  | -6.126303000 | -3.816383000 | 6 | 2.131032000  | -6.437133000 | -3.277157000 |
| 6 | 0.679946000  | -6.326139000 | -4.011877000 | 6 | 0.766849000  | -6.594369000 | -3.451385000 |
| 6 | 4.115106000  | -4.797484000 | -4.290266000 | 6 | 4.217080000  | -5.220760000 | -3.848383000 |
| 6 | 4.538470000  | -3.518919000 | -4.743026000 | 6 | 4.620436000  | -3.962006000 | -4.342011000 |
| 6 | 5.540651000  | -2.814061000 | -4.076108000 | 6 | 5.598945000  | -3.225145000 | -3.695841000 |
| 6 | 6.168448000  | -3.350737000 | -2.920689000 | 6 | 6.219545000  | -3.714635000 | -2.527385000 |
| 6 | 5.877116000  | -4.702836000 | -2.587318000 | 6 | 5.954489000  | -5.051211000 | -2.153464000 |
| 6 | 4.877013000  | -5.407928000 | -3.254841000 | 6 | 4.976298000  | -5.787855000 | -2.799562000 |
| 1 | 7.579779000  | -1.009467000 | -3.469972000 | 1 | 7.662689000  | -1.450870000 | -3.163819000 |
| 1 | 8.176137000  | 0.725350000  | -1.827226000 | 1 | 8.205138000  | 0.374654000  | -1.617405000 |
| 1 | 6.990989000  | -1.940044000 | 1.400355000  | 1 | 6.898874000  | -2.059949000 | 1.697801000  |
| 1 | 6.405775000  | -3.662818000 | -0.229857000 | 1 | 6.354741000  | -3.867871000 | 0.164326000  |
| 1 | 7.204632000  | 2.221718000  | -0.624924000 | 1 | 7.010877000  | 1.882535000  | -0.549931000 |
| 1 | 6.396241000  | 3.915248000  | 0.940693000  | 1 | 6.289079000  | 3.677073000  | 0.927194000  |
| 1 | 7.091669000  | 1.190238000  | 4.258911000  | 1 | 7.264332000  | 1.255639000  | 4.362872000  |
| 1 | 7.910540000  | -0.511804000 | 2.683559000  | 1 | 7.998039000  | -0.550470000 | 2.873573000  |
| 1 | 5.946628000  | 5.367391000  | 2.468579000  | 1 | 6.110590000  | 5.280780000  | 2.429818000  |
| 1 | 3.951550000  | 6.448017000  | 3.402219000  | 1 | 4.171375000  | 6.448052000  | 3.336681000  |
| 1 | 3.182274000  | 2.911343000  | 5.821220000  | 1 | 3.354149000  | 3.064662000  | 5.896612000  |
| 1 | 5.167978000  | 1.847960000  | 4.903344000  | 1 | 5.283330000  | 1.919780000  | 5.003853000  |
| 1 | 1.908181000  | 6.675401000  | 3.291944000  | 1 | 2.168461000  | 6.743734000  | 3.227167000  |
| 1 | -0.504627000 | 7.000466000  | 3.343306000  | 1 | -0.225941000 | 7.084285000  | 3.181500000  |
| 1 | -0.815085000 | 4.155549000  | 6.624182000  | 1 | -0.685842000 | 4.241096000  | 6.400151000  |
| 1 | 1.605728000  | 3.890007000  | 6.622614000  | 1 | 1.712687000  | 3.993297000  | 6.528694000  |
| 1 | -2.330495000 | 6.419367000  | 2.757629000  | 1 | -1.976337000 | 6.325881000  | 2.438996000  |
| 1 | -4.533274000 | 5.643298000  | 2.073261000  | 1 | -4.140659000 | 5.517958000  | 1.710403000  |
| 1 | -5.039309000 | 3.650676000  | 5.905358000  | 1 | -4.862358000 | 3.867005000  | 5.629651000  |
| 1 | -2.826195000 | 4.443013000  | 6.605208000  | 1 | -2.690290000 | 4.700888000  | 6.377175000  |
| 1 | -6.608265000 | 5.145200000  | 1.760272000  | 1 | -6.329901000 | 5.158642000  | 1.486156000  |
| 1 | -7.777826000 | 3.505255000  | 0.344202000  | 1 | -7.610846000 | 3.525372000  | 0.176831000  |
| 1 | -6.915957000 | 0.388683000  | 3.253458000  | 1 | -6.676643000 | 0.477569000  | 3.086217000  |
| 1 | -5.757398000 | 2.018315000  | 4.661720000  | 1 | -5.423169000 | 2.102254000  | 4.393402000  |
| 1 | -7.158191000 | 2.013197000  | -1.067595000 | 1 | -7.015903000 | 1.946233000  | -1.205281000 |
| 1 | -6.972939000 | 0.182203000  | -2.677319000 | 1 | -6.847457000 | 0.036371000  | -2.697931000 |
| 1 | -8.047465000 | -2.668416000 | 0.426077000  | 1 | -8.042784000 | -2.590560000 | 0.509759000  |
| 1 | -8.237970000 | -0.823624000 | 2.049158000  | 1 | -8.211496000 | -0.662140000 | 2.017657000  |
| 1 | -7.361761000 | -1.487231000 | -4.021276000 | 1 | -7.222539000 | -1.733474000 | -3.934758000 |
| 1 | -5.921857000 | -2.967288000 | -5.371120000 | 1 | -5.740342000 | -3.283338000 | -5.129447000 |
| 1 | -4.965007000 | -5.270373000 | -1.808693000 | 1 | -4.836561000 | -5.273452000 | -1.409766000 |
| 1 | -6.391833000 | -3.797144000 | -0.466753000 | 1 | -6.306941000 | -3.737656000 | -0.223888000 |
| 1 | -3.752957000 | -3.119760000 | -5.674762000 | 1 | -3.521681000 | -3.382961000 | -5.297646000 |
| 1 | -1.484816000 | -3.791565000 | -6.300819000 | 1 | -1.269507000 | -4.131427000 | -5.842532000 |
| 1 | -1.876426000 | -7.391386000 | -3.891311000 | 1 | -1.810583000 | -7.607116000 | -3.342789000 |
| 1 | -4.162578000 | -6.714409000 | -3.261521000 | 1 | -4.082025000 | -6.852162000 | -2.794743000 |
| 1 | 0.332141000  | -4.724105000 | -7.024020000 | 1 | 0.471393000  | -5.269048000 | -6.574854000 |
| 1 | 2.744843000  | -4.370478000 | -6.677803000 | 1 | 2.889271000  | -4.987397000 | -6.264754000 |
| 1 | 2.501357000  | -6.487179000 | -2.886160000 | 1 | 2.573275000  | -6.718821000 | -2.325296000 |
| 1 | 0.105570000  | -6.835335000 | -3.228301000 | 1 | 0.176956000  | -6.997824000 | -2.632572000 |
| 1 | 3.988251000  | -3.014613000 | -5.546799000 | 1 | 4.064939000  | -3.496552000 | -5.152190000 |

|    |              |              |              |    |              |              |              |
|----|--------------|--------------|--------------|----|--------------|--------------|--------------|
| 1  | 5.745425000  | -1.779129000 | -4.377389000 | 1  | 5.782516000  | -2.202971000 | -4.017140000 |
| 1  | 6.416264000  | -5.189702000 | -1.764030000 | 1  | 6.500347000  | -5.496559000 | -1.324276000 |
| 1  | 4.649680000  | -6.436022000 | -2.943857000 | 1  | 4.765012000  | -6.802749000 | -2.469227000 |
| 71 | -1.747262000 | 0.887684000  | 0.612686000  | 64 | 0.895782000  | -1.531751000 | -1.052289000 |
| 71 | -0.289340000 | -1.905307000 | -1.038530000 | 64 | 1.278940000  | 1.252809000  | 0.923616000  |
| 71 | 1.787935000  | 0.581190000  | 0.421617000  | 64 | -1.866697000 | 0.046823000  | 0.241561000  |
| 7  | -0.083941000 | -0.140813000 | -0.010664000 | 7  | 0.135479000  | -0.485909000 | 0.605863000  |
| 6  | 3.169193000  | 0.857808000  | -2.411828000 | 6  | -2.747801000 | 2.719520000  | -0.761044000 |
| 6  | 3.657408000  | -0.325623000 | -1.766188000 | 6  | -2.823940000 | 2.703927000  | 0.661113000  |
| 6  | 4.083578000  | -0.185897000 | -0.373888000 | 6  | -3.564040000 | 1.614532000  | 1.276074000  |
| 6  | -2.278218000 | 1.390671000  | 3.145794000  | 6  | 0.837568000  | -4.154023000 | -0.517065000 |
| 6  | 2.124585000  | 0.797140000  | -3.415792000 | 6  | -1.596332000 | 3.270983000  | -1.438862000 |
| 6  | 0.137075000  | -0.480893000 | -4.134315000 | 6  | 0.825224000  | 3.679425000  | -1.261852000 |
| 6  | 1.531833000  | -0.463763000 | -3.790297000 | 6  | -0.487167000 | 3.822117000  | -0.715505000 |
| 6  | 2.074964000  | -1.662611000 | -3.211893000 | 6  | -0.583542000 | 3.884270000  | 0.704100000  |
| 6  | 2.925568000  | -2.695781000 | -1.285300000 | 6  | -1.274344000 | 2.801569000  | 2.642492000  |
| 6  | 3.229901000  | -2.542927000 | 0.110374000  | 6  | -1.885931000 | 1.641185000  | 3.203848000  |
| 6  | 3.807573000  | -1.278218000 | 0.539225000  | 6  | -3.024793000 | 1.064964000  | 2.504511000  |
| 6  | 2.415004000  | -3.247759000 | 1.050248000  | 6  | -1.045117000 | 0.773052000  | 3.947920000  |
| 6  | 1.759479000  | -3.460829000 | -1.725099000 | 6  | 0.150106000  | 3.060062000  | 2.759115000  |
| 6  | -0.535166000 | -4.269883000 | -1.143288000 | 6  | 2.394726000  | 2.036030000  | 2.977976000  |
| 6  | 0.888494000  | -4.139164000 | -0.785293000 | 6  | 1.017631000  | 2.154698000  | 3.456234000  |
| 6  | 1.247921000  | -4.010625000 | 0.612961000  | 6  | 0.387414000  | 1.016155000  | 4.063041000  |
| 6  | -0.705930000 | -1.636817000 | -3.837865000 | 6  | 2.001064000  | 3.541698000  | -0.410409000 |
| 6  | -0.186194000 | -2.867771000 | -3.271931000 | 6  | 1.945890000  | 3.628964000  | 1.035983000  |
| 6  | 1.230777000  | -2.825438000 | -2.934876000 | 6  | 0.594567000  | 3.759991000  | 1.561826000  |
| 6  | -1.082014000 | -3.644576000 | -2.387729000 | 6  | 2.895056000  | 2.782824000  | 1.795567000  |
| 6  | 2.226876000  | 2.726744000  | 1.940375000  | 6  | -3.480904000 | -1.996483000 | -0.792338000 |
| 6  | 2.762641000  | 1.533318000  | 2.563036000  | 6  | -3.579510000 | -1.979226000 | 0.639717000  |
| 6  | 3.564219000  | -0.724876000 | 1.853512000  | 6  | -3.258285000 | -0.356642000 | 2.504360000  |
| 6  | 3.727656000  | 0.731393000  | 1.792171000  | 6  | -3.965721000 | -0.717261000 | 1.279615000  |
| 6  | 2.540380000  | 3.069061000  | 0.549447000  | 6  | -3.658762000 | -0.784893000 | -1.578536000 |
| 6  | 3.004552000  | 2.098964000  | -1.648832000 | 6  | -3.280318000 | 1.616722000  | -1.556033000 |
| 6  | 3.425155000  | 2.245138000  | -0.266661000 | 6  | -3.983182000 | 0.495498000  | -0.968108000 |
| 6  | 4.072033000  | 1.081437000  | 0.379262000  | 6  | -4.194841000 | 0.525172000  | 0.496324000  |
| 6  | -0.416007000 | 3.643860000  | -1.707834000 | 6  | -0.820562000 | 0.015159000  | -3.887940000 |
| 6  | 0.987081000  | 3.594645000  | -1.379415000 | 6  | -2.111843000 | 0.216766000  | -3.297561000 |
| 6  | 1.365864000  | 3.750107000  | -0.000196000 | 6  | -2.769296000 | -0.913056000 | -2.731988000 |
| 6  | 1.844722000  | 2.791193000  | -2.204562000 | 6  | -2.404584000 | 1.487669000  | -2.714261000 |
| 6  | -3.733509000 | 0.496351000  | -1.895670000 | 6  | 3.430202000  | 0.091763000  | -2.310185000 |
| 6  | -2.882472000 | -1.780927000 | -2.585657000 | 6  | 3.744805000  | 1.728696000  | -0.402909000 |
| 6  | -3.754343000 | -0.951904000 | -1.779457000 | 6  | 4.010351000  | 0.455681000  | -1.035229000 |
| 6  | -2.365234000 | -3.022707000 | -2.012533000 | 6  | 3.740310000  | 1.820768000  | 1.047874000  |
| 6  | -4.045082000 | 1.077211000  | -0.586881000 | 6  | 3.239435000  | -1.354760000 | -2.356251000 |
| 6  | -3.249425000 | 2.544217000  | 1.295620000  | 6  | 1.588778000  | -3.232377000 | -2.584030000 |
| 6  | -3.519969000 | 2.365269000  | -0.149414000 | 6  | 2.181272000  | -1.990773000 | -3.126195000 |
| 6  | -2.599999000 | 2.984614000  | -1.086735000 | 6  | 1.283409000  | -1.053389000 | -3.766222000 |
| 6  | -3.338734000 | -1.119467000 | 2.359356000  | 6  | 2.955950000  | -2.988549000 | 0.965335000  |
| 6  | -3.876941000 | 0.076731000  | 1.744575000  | 6  | 3.054769000  | -3.011092000 | -0.467221000 |
| 6  | -4.232680000 | -0.038031000 | 0.343965000  | 6  | 3.683283000  | -1.867713000 | -1.068941000 |
| 6  | -3.421401000 | 1.389421000  | 2.229108000  | 6  | 2.022737000  | -3.707117000 | -1.243390000 |
| 6  | -2.627569000 | -3.291770000 | -0.610787000 | 6  | 3.803313000  | 0.574108000  | 1.784386000  |

|                                                                                |              |              |              |                                                                               |              |              |              |
|--------------------------------------------------------------------------------|--------------|--------------|--------------|-------------------------------------------------------------------------------|--------------|--------------|--------------|
| 6                                                                              | -3.466151000 | -2.437757000 | 0.217796000  | 6                                                                             | 4.009496000  | -0.717541000 | 1.148731000  |
| 6                                                                              | -4.052342000 | -1.282118000 | -0.400638000 | 6                                                                             | 4.158694000  | -0.750637000 | -0.268985000 |
| 6                                                                              | -3.159718000 | -2.362806000 | 1.612559000  | 6                                                                             | 3.441789000  | -1.865688000 | 1.758975000  |
| 6                                                                              | -1.504769000 | -4.026585000 | -0.069223000 | 6                                                                             | 2.974603000  | 0.700290000  | 2.954546000  |
| 6                                                                              | 0.244351000  | -3.907190000 | 1.666589000  | 6                                                                             | 1.038847000  | -0.275379000 | 4.109132000  |
| 6                                                                              | -1.151997000 | -3.866839000 | 1.337974000  | 6                                                                             | 2.320988000  | -0.465625000 | 3.514264000  |
| 6                                                                              | -2.014028000 | -3.064335000 | 2.164268000  | 6                                                                             | 2.600632000  | -1.738611000 | 2.925007000  |
| 6                                                                              | -1.976343000 | 3.190663000  | 1.669083000  | 6                                                                             | 0.114496000  | -3.373487000 | -2.604603000 |
| 6                                                                              | -1.055492000 | 3.811308000  | 0.718713000  | 6                                                                             | -0.767277000 | -2.389176000 | -3.211884000 |
| 6                                                                              | -1.418783000 | 3.744908000  | -0.666701000 | 6                                                                             | -0.158046000 | -1.269389000 | -3.845026000 |
| 6                                                                              | 0.356147000  | 3.849131000  | 1.040170000  | 6                                                                             | -2.092622000 | -2.188506000 | -2.671454000 |
| 6                                                                              | -0.957090000 | 2.819254000  | -2.769676000 | 6                                                                             | 0.192635000  | 1.030815000  | -3.801308000 |
| 6                                                                              | -0.109521000 | 1.950457000  | -3.544654000 | 6                                                                             | -0.062807000 | 2.270751000  | -3.134365000 |
| 6                                                                              | 1.305956000  | 1.985066000  | -3.280208000 | 6                                                                             | -1.383365000 | 2.500356000  | -2.633381000 |
| 6                                                                              | -0.673849000 | 0.713990000  | -4.021559000 | 6                                                                             | 1.029004000  | 2.903941000  | -2.458704000 |
| 6                                                                              | -2.298133000 | 2.418022000  | -2.399273000 | 6                                                                             | 1.479837000  | 0.389173000  | -3.725797000 |
| 6                                                                              | -2.050298000 | -1.125648000 | -3.551264000 | 6                                                                             | 2.909916000  | 2.639554000  | -1.113258000 |
| 6                                                                              | -2.830168000 | 1.147317000  | -2.806780000 | 6                                                                             | 2.536251000  | 0.982399000  | -2.969267000 |
| 6                                                                              | -2.023580000 | 0.319751000  | -3.670144000 | 6                                                                             | 2.315630000  | 2.270591000  | -2.378841000 |
| 6                                                                              | -1.415814000 | 2.505561000  | 2.817605000  | 6                                                                             | -0.320941000 | -3.961113000 | -1.352435000 |
| 6                                                                              | 0.536250000  | 1.351598000  | 3.789066000  | 6                                                                             | -1.762470000 | -3.745098000 | 0.640619000  |
| 6                                                                              | 0.007229000  | 2.501106000  | 3.122610000  | 6                                                                             | -1.634176000 | -3.714549000 | -0.772138000 |
| 6                                                                              | 0.879214000  | 3.213507000  | 2.232334000  | 6                                                                             | -2.528707000 | -2.855529000 | -1.477678000 |
| 6                                                                              | -2.286906000 | -1.065882000 | 3.369574000  | 6                                                                             | 1.806239000  | -3.535791000 | 1.657178000  |
| 6                                                                              | -0.308935000 | 0.209993000  | 4.094429000  | 6                                                                             | -0.601598000 | -3.918733000 | 1.480095000  |
| 6                                                                              | -1.705872000 | 0.190843000  | 3.747894000  | 6                                                                             | 0.708604000  | -4.081132000 | 0.927793000  |
| 6                                                                              | 3.121234000  | -1.595484000 | -2.205740000 | 6                                                                             | -1.724351000 | 3.307594000  | 1.376949000  |
| 6                                                                              | 0.787401000  | -3.094576000 | 2.736694000  | 6                                                                             | 0.024305000  | -1.297516000 | 4.028204000  |
| 6                                                                              | 0.502866000  | -0.989355000 | 3.987691000  | 6                                                                             | -0.814932000 | -3.163572000 | 2.689929000  |
| 6                                                                              | -0.060426000 | -2.224232000 | 3.508113000  | 6                                                                             | 0.275974000  | -2.531747000 | 3.357791000  |
| 6                                                                              | -1.475047000 | -2.260417000 | 3.246435000  | 6                                                                             | 1.592425000  | -2.767268000 | 2.858419000  |
| 6                                                                              | 2.129391000  | -2.688414000 | 2.359843000  | 6                                                                             | -1.262513000 | -0.653678000 | 3.931898000  |
| 6                                                                              | 1.880683000  | 0.860715000  | 3.495716000  | 6                                                                             | -2.706982000 | -2.881092000 | 1.338381000  |
| 6                                                                              | 2.658842000  | -1.414012000 | 2.767539000  | 6                                                                             | -2.331938000 | -1.242814000 | 3.186136000  |
| 6                                                                              | 1.848333000  | -0.592864000 | 3.621719000  | 6                                                                             | -2.105638000 | -2.525758000 | 2.606748000  |
| <b>([11]CPP<math>\supset</math>D<sub>2d</sub>-C<sub>84</sub>)<sup>++</sup></b> |              |              |              | <b>([11]CPP<math>\supset</math>D<sub>2</sub>-C<sub>84</sub>)<sup>++</sup></b> |              |              |              |
| 6                                                                              | 7.889436000  | -1.699900000 | -0.669509000 | 6                                                                             | 7.954681000  | -1.810168000 | -0.525200000 |
| 6                                                                              | 8.052397000  | -0.319814000 | -0.557710000 | 6                                                                             | 8.093503000  | -0.424091000 | -0.481275000 |
| 6                                                                              | 7.639780000  | 0.381161000  | 0.611817000  | 6                                                                             | 7.688656000  | 0.321896000  | 0.662488000  |
| 6                                                                              | 7.234195000  | -0.407826000 | 1.723859000  | 6                                                                             | 7.327692000  | -0.417010000 | 1.821935000  |
| 6                                                                              | 7.080086000  | -1.788304000 | 1.616056000  | 6                                                                             | 7.193640000  | -1.803735000 | 1.780233000  |
| 6                                                                              | 7.417516000  | 1.838950000  | 0.612596000  | 6                                                                             | 7.415330000  | 1.768075000  | 0.591373000  |
| 6                                                                              | 7.316914000  | 2.562537000  | -0.609045000 | 6                                                                             | 7.165841000  | 2.387781000  | -0.664203000 |
| 6                                                                              | 6.721692000  | 3.821561000  | -0.658788000 | 6                                                                             | 6.542539000  | 3.630020000  | -0.746761000 |
| 6                                                                              | 6.184052000  | 4.430651000  | 0.508933000  | 6                                                                             | 6.124041000  | 4.329193000  | 0.419701000  |
| 6                                                                              | 6.465101000  | 3.794338000  | 1.750333000  | 6                                                                             | 6.537562000  | 3.789692000  | 1.670689000  |
| 6                                                                              | 7.067983000  | 2.539080000  | 1.800360000  | 6                                                                             | 7.164408000  | 2.547797000  | 1.754148000  |
| 6                                                                              | 5.190405000  | 5.517153000  | 0.432721000  | 6                                                                             | 5.141126000  | 5.426191000  | 0.345335000  |
| 6                                                                              | 4.471512000  | 5.742852000  | -0.774301000 | 6                                                                             | 4.440583000  | 5.690596000  | -0.864448000 |
| 6                                                                              | 3.280076000  | 6.465214000  | -0.783358000 | 6                                                                             | 3.280418000  | 6.461456000  | -0.879353000 |
| 6                                                                              | 2.735684000  | 6.994804000  | 0.417754000  | 6                                                                             | 2.744379000  | 7.003735000  | 0.318966000  |

|   |              |              |              |   |              |              |              |
|---|--------------|--------------|--------------|---|--------------|--------------|--------------|
| 6 | 3.541558000  | 6.922262000  | 1.586997000  | 6 | 3.533688000  | 6.884944000  | 1.496180000  |
| 6 | 4.740029000  | 6.209156000  | 1.592116000  | 6 | 4.701458000  | 6.123979000  | 1.506837000  |
| 6 | 1.310795000  | 7.364465000  | 0.468894000  | 6 | 1.336259000  | 7.430977000  | 0.357769000  |
| 6 | 0.590086000  | 7.757105000  | -0.692265000 | 6 | 0.640002000  | 7.852802000  | -0.809094000 |
| 6 | -0.803989000 | 7.723672000  | -0.718609000 | 6 | -0.753871000 | 7.869406000  | -0.847438000 |
| 6 | -1.549666000 | 7.289023000  | 0.412010000  | 6 | -1.522440000 | 7.458671000  | 0.277023000  |
| 6 | -0.832939000 | 7.063932000  | 1.618572000  | 6 | -0.824700000 | 7.209216000  | 1.489962000  |
| 6 | 0.560495000  | 7.102040000  | 1.646900000  | 6 | 0.568121000  | 7.196587000  | 1.530095000  |
| 6 | -2.948557000 | 6.837853000  | 0.297101000  | 6 | -2.932848000 | 7.049181000  | 0.156111000  |
| 6 | -3.430035000 | 6.348571000  | -0.947408000 | 6 | -3.419182000 | 6.552989000  | -1.083146000 |
| 6 | -4.582925000 | 5.568004000  | -1.017652000 | 6 | -4.579503000 | 5.781710000  | -1.143133000 |
| 6 | -5.313538000 | 5.230519000  | 0.153503000  | 6 | -5.315452000 | 5.468459000  | 0.031809000  |
| 6 | -4.927070000 | 5.859751000  | 1.368418000  | 6 | -4.932883000 | 6.125475000  | 1.234439000  |
| 6 | -3.776084000 | 6.644971000  | 1.437846000  | 6 | -3.772049000 | 6.894923000  | 1.295035000  |
| 6 | -6.254119000 | 4.096078000  | 0.122250000  | 6 | -6.244166000 | 4.323999000  | 0.028916000  |
| 6 | -6.879676000 | 3.670036000  | -1.082160000 | 6 | -6.818902000 | 3.823968000  | -1.172573000 |
| 6 | -7.441788000 | 2.398525000  | -1.190287000 | 6 | -7.343673000 | 2.533957000  | -1.235842000 |
| 6 | -7.404679000 | 1.484715000  | -0.100916000 | 6 | -7.325428000 | 1.677285000  | -0.100292000 |
| 6 | -6.940892000 | 1.978857000  | 1.148649000  | 6 | -6.922604000 | 2.244105000  | 1.138598000  |
| 6 | -6.379866000 | 3.251229000  | 1.257633000  | 6 | -6.393547000 | 3.532980000  | 1.200904000  |
| 6 | -7.582332000 | 0.033916000  | -0.294611000 | 6 | -7.475535000 | 0.216156000  | -0.225096000 |
| 6 | -7.286024000 | -0.548005000 | -1.556500000 | 6 | -7.098206000 | -0.425807000 | -1.435144000 |
| 6 | -7.045169000 | -1.915528000 | -1.681123000 | 6 | -6.863905000 | -1.799296000 | -1.478840000 |
| 6 | -7.090684000 | -2.777134000 | -0.552193000 | 6 | -6.994351000 | -2.604467000 | -0.315178000 |
| 6 | -7.575968000 | -2.223191000 | 0.666075000  | 6 | -7.537875000 | -1.988872000 | 0.846396000  |
| 6 | -7.812251000 | -0.854780000 | 0.792566000  | 6 | -7.770862000 | -0.614288000 | 0.891072000  |
| 6 | -6.431643000 | -4.095615000 | -0.604958000 | 6 | -6.357923000 | -3.933950000 | -0.273341000 |
| 6 | -6.116554000 | -4.731807000 | -1.838953000 | 6 | -6.056402000 | -4.663536000 | -1.457239000 |
| 6 | -5.172048000 | -5.755230000 | -1.903799000 | 6 | -5.124340000 | -5.700279000 | -1.446196000 |
| 6 | -4.491482000 | -6.203717000 | -0.737628000 | 6 | -4.443843000 | -6.063389000 | -0.250404000 |
| 6 | -4.939299000 | -5.692284000 | 0.510392000  | 6 | -4.882559000 | -5.456892000 | 0.957041000  |
| 6 | -5.881917000 | -4.666690000 | 0.574761000  | 6 | -5.814418000 | -4.419566000 | 0.945956000  |
| 6 | -3.233076000 | -6.967894000 | -0.810783000 | 6 | -3.190089000 | -6.839596000 | -0.268938000 |
| 6 | -2.410893000 | -6.876386000 | -1.967005000 | 6 | -2.367192000 | -6.830252000 | -1.427244000 |
| 6 | -1.066167000 | -7.242496000 | -1.927157000 | 6 | -1.030285000 | -7.222849000 | -1.366031000 |
| 6 | -0.470039000 | -7.716579000 | -0.727457000 | 6 | -0.443911000 | -7.645651000 | -0.143054000 |
| 6 | -1.338210000 | -7.986023000 | 0.367457000  | 6 | -1.312876000 | -7.819807000 | 0.970078000  |
| 6 | -2.682964000 | -7.621795000 | 0.326933000  | 6 | -2.649194000 | -7.427004000 | 0.909018000  |
| 6 | 0.995687000  | -7.685644000 | -0.569621000 | 6 | 1.023174000  | -7.657235000 | 0.002429000  |
| 6 | 1.874478000  | -7.642965000 | -1.688377000 | 6 | 1.893965000  | -7.751613000 | -1.118434000 |
| 6 | 3.196897000  | -7.223660000 | -1.551793000 | 6 | 3.230440000  | -7.364189000 | -1.026076000 |
| 6 | 3.713304000  | -6.815595000 | -0.290209000 | 6 | 3.767480000  | -6.862232000 | 0.192075000  |
| 6 | 2.886737000  | -7.031481000 | 0.846919000  | 6 | 2.945571000  | -6.946121000 | 1.348327000  |
| 6 | 1.566823000  | -7.459402000 | 0.711351000  | 6 | 1.609305000  | -7.332281000 | 1.255801000  |
| 6 | 4.931186000  | -5.992149000 | -0.174415000 | 6 | 5.006429000  | -6.063685000 | 0.233171000  |
| 6 | 5.381132000  | -5.226819000 | -1.284941000 | 6 | 5.439211000  | -5.363035000 | -0.924771000 |
| 6 | 6.266121000  | -4.162388000 | -1.119882000 | 6 | 6.337078000  | -4.299965000 | -0.829216000 |
| 6 | 6.433005000  | -4.673241000 | 1.248169000  | 6 | 6.562934000  | -4.704109000 | 1.554853000  |
| 6 | 5.555055000  | -5.742982000 | 1.080217000  | 6 | 5.668034000  | -5.768184000 | 1.458372000  |
| 6 | 6.743119000  | -3.800020000 | 0.168151000  | 6 | 6.847892000  | -3.881340000 | 0.429711000  |
| 6 | 7.313335000  | -2.459539000 | 0.385970000  | 6 | 7.411166000  | -2.527889000 | 0.576327000  |
| 1 | 8.174772000  | -2.197064000 | -1.605991000 | 1 | 8.231133000  | -2.346846000 | -1.442463000 |



|   |              |              |              |   |              |              |              |
|---|--------------|--------------|--------------|---|--------------|--------------|--------------|
| 1 | 8.464754000  | 0.232128000  | -1.411656000 | 1 | 8.478647000  | 0.097760000  | -1.366580000 |
| 1 | 6.922327000  | 0.075412000  | 2.656535000  | 1 | 7.020106000  | 0.108989000  | 2.733494000  |
| 1 | 6.648065000  | -2.335998000 | 2.462802000  | 1 | 6.786200000  | -2.318153000 | 2.659158000  |
| 1 | 7.623128000  | 2.094411000  | -1.552275000 | 1 | 7.376819000  | 1.846852000  | -1.594392000 |
| 1 | 6.611396000  | 4.312394000  | -1.633777000 | 1 | 6.316863000  | 4.030909000  | -1.741509000 |
| 1 | 6.119646000  | 4.244485000  | 2.688806000  | 1 | 6.294699000  | 4.312079000  | 2.603624000  |
| 1 | 7.204158000  | 2.063908000  | 2.779378000  | 1 | 7.415066000  | 2.149414000  | 2.745351000  |
| 1 | 4.783950000  | 5.245369000  | -1.699488000 | 1 | 4.744982000  | 5.202205000  | -1.796431000 |
| 1 | 2.697353000  | 6.509516000  | -1.711612000 | 1 | 2.712585000  | 6.539582000  | -1.814708000 |
| 1 | 3.199857000  | 7.402165000  | 2.513771000  | 1 | 3.201512000  | 7.367079000  | 2.425107000  |
| 1 | 5.314184000  | 6.146984000  | 2.525340000  | 1 | 5.255716000  | 6.029316000  | 2.448563000  |
| 1 | 1.136464000  | 8.054988000  | -1.597040000 | 1 | 1.204774000  | 8.133011000  | -1.708257000 |
| 1 | -1.327079000 | 7.997632000  | -1.644136000 | 1 | -1.260443000 | 8.162213000  | -1.776549000 |
| 1 | -1.367092000 | 6.729620000  | 2.516312000  | 1 | -1.378573000 | 6.894124000  | 2.382583000  |
| 1 | 1.077922000  | 6.797930000  | 2.565389000  | 1 | 1.066104000  | 6.873079000  | 2.452275000  |
| 1 | -2.826139000 | 6.474657000  | -1.854236000 | 1 | -2.809979000 | 6.657147000  | -1.989653000 |
| 1 | -4.848947000 | 5.107724000  | -1.977204000 | 1 | -4.843785000 | 5.306033000  | -2.095547000 |
| 1 | -5.519571000 | 5.696594000  | 2.278426000  | 1 | -5.533616000 | 5.992107000  | 2.143766000  |
| 1 | -3.487287000 | 7.084706000  | 2.401527000  | 1 | -3.482931000 | 7.351700000  | 2.250724000  |
| 1 | -6.888202000 | 4.335225000  | -1.955778000 | 1 | -6.814142000 | 4.443780000  | -2.078833000 |
| 1 | -7.880846000 | 2.088262000  | -2.147591000 | 1 | -7.741151000 | 2.163993000  | -2.190198000 |
| 1 | -6.902556000 | 1.311135000  | 2.018016000  | 1 | -6.902086000 | 1.621682000  | 2.041830000  |
| 1 | -5.916872000 | 3.543498000  | 2.208334000  | 1 | -5.973772000 | 3.882346000  | 2.152157000  |
| 1 | -7.111607000 | 0.095976000  | -2.426992000 | 1 | -6.862544000 | 0.176513000  | -2.321231000 |
| 1 | -6.691448000 | -2.296501000 | -2.646552000 | 1 | -6.451776000 | -2.232461000 | -2.398235000 |
| 1 | -7.724676000 | -2.870491000 | 1.540036000  | 1 | -7.741328000 | -2.594225000 | 1.739507000  |
| 1 | -8.140331000 | -0.456767000 | 1.761926000  | 1 | -8.152254000 | -0.165449000 | 1.817861000  |
| 1 | -6.592488000 | -4.390329000 | -2.767194000 | 1 | -6.531504000 | -4.382956000 | -2.406415000 |
| 1 | -4.927537000 | -6.192602000 | -2.880664000 | 1 | -4.886087000 | -6.213653000 | -2.386967000 |
| 1 | -4.451650000 | -6.013606000 | 1.438701000  | 1 | -4.393512000 | -5.712016000 | 1.905077000  |
| 1 | -6.102952000 | -4.221040000 | 1.552106000  | 1 | -6.025225000 | -3.893751000 | 1.885154000  |
| 1 | -2.795226000 | -6.393518000 | -2.873754000 | 1 | -2.743232000 | -6.392045000 | -2.359827000 |
| 1 | -0.440150000 | -7.030333000 | -2.802381000 | 1 | -0.399498000 | -7.077022000 | -2.251433000 |
| 1 | -0.939453000 | -8.449390000 | 1.279283000  | 1 | -0.921065000 | -8.234770000 | 1.908020000  |
| 1 | -3.311941000 | -7.807103000 | 1.207402000  | 1 | -3.280107000 | -7.542151000 | 1.800069000  |
| 1 | 1.500188000  | -7.905733000 | -2.686332000 | 1 | 1.502233000  | -8.091816000 | -2.086039000 |
| 1 | 3.830995000  | -7.168715000 | -2.446016000 | 1 | 3.861533000  | -7.407842000 | -1.923386000 |
| 1 | 3.242889000  | -6.746167000 | 1.844050000  | 1 | 3.318786000  | -6.579086000 | 2.312126000  |
| 1 | 0.933402000  | -7.492260000 | 1.606252000  | 1 | 0.978532000  | -7.256716000 | 2.149935000  |
| 1 | 4.936640000  | -5.386431000 | -2.274570000 | 1 | 4.965833000  | -5.564054000 | -1.893896000 |
| 1 | 6.484838000  | -3.521576000 | -1.982987000 | 1 | 6.541634000  | -3.702367000 | -1.726261000 |
| 1 | 6.860808000  | -4.484189000 | 2.241573000  | 1 | 7.019642000  | -4.475430000 | 2.526890000  |
| 1 | 5.312984000  | -6.372433000 | 1.946212000  | 1 | 5.440135000  | -6.356372000 | 2.356849000  |
| 6 | -0.123764000 | -0.476866000 | -4.378219000 | 6 | -0.633938000 | -0.789407000 | -4.120399000 |
| 6 | -0.040651000 | -1.875979000 | -3.975129000 | 6 | 0.654731000  | -0.164061000 | -4.224112000 |
| 6 | 1.342928000  | -2.156020000 | -3.673903000 | 6 | 0.665621000  | 1.256171000  | -4.069047000 |
| 6 | 2.095005000  | -0.909422000 | -3.862156000 | 6 | -1.796106000 | -0.070509000 | -3.665715000 |
| 6 | 1.179502000  | 0.156518000  | -4.201607000 | 6 | -1.753453000 | 1.321944000  | -3.358039000 |
| 6 | -1.290475000 | 0.229628000  | -4.153759000 | 6 | -0.514254000 | 1.987619000  | -3.668375000 |
| 6 | -2.439965000 | -0.407793000 | -3.518751000 | 6 | 1.856053000  | -0.940748000 | -3.841836000 |
| 6 | -2.351529000 | -1.725701000 | -2.964935000 | 6 | 2.988149000  | -0.245584000 | -3.302405000 |
| 6 | -1.119341000 | -2.491672000 | -3.245645000 | 6 | -0.762064000 | -2.158185000 | -3.634031000 |

|   |              |              |              |   |              |              |              |
|---|--------------|--------------|--------------|---|--------------|--------------|--------------|
| 6 | -0.73888000  | -3.544823000 | -2.362187000 | 6 | 0.361022000  | -2.893146000 | -3.285212000 |
| 6 | 0.641711000  | -3.861124000 | -2.097591000 | 6 | 1.694819000  | -2.298954000 | -3.404887000 |
| 6 | 1.716923000  | -3.090094000 | -2.658721000 | 6 | -1.972712000 | -2.273910000 | -2.837764000 |
| 6 | 2.900171000  | -2.797262000 | -1.817722000 | 6 | -2.003550000 | -3.094768000 | -1.655747000 |
| 6 | 3.639018000  | -1.594083000 | -2.047615000 | 6 | -2.948994000 | -2.705399000 | -0.666728000 |
| 6 | 3.207854000  | -0.636331000 | -3.073924000 | 6 | -3.446932000 | -0.523218000 | -1.819254000 |
| 6 | 3.436293000  | 0.711504000  | -2.601422000 | 6 | -2.632435000 | -0.990370000 | -2.886455000 |
| 6 | 2.480565000  | 1.759581000  | -2.807782000 | 6 | -3.699481000 | -1.477586000 | -0.771809000 |
| 6 | 1.302704000  | 1.469645000  | -3.643979000 | 6 | -3.487850000 | 0.924288000  | -1.523847000 |
| 6 | 0.055139000  | 2.235966000  | -3.446522000 | 6 | -2.220349000 | 3.068401000  | -1.657829000 |
| 6 | -1.217021000 | 1.624967000  | -3.734435000 | 6 | -2.624996000 | 1.848187000  | -2.287692000 |
| 6 | -2.393334000 | 1.901504000  | -2.945297000 | 6 | -3.886807000 | 1.308288000  | -0.205885000 |
| 6 | -3.165116000 | 0.655051000  | -2.856915000 | 6 | 1.693400000  | -3.833446000 | -1.628318000 |
| 6 | -3.908283000 | 0.372968000  | -1.716506000 | 6 | 2.519133000  | -2.872373000 | -2.370261000 |
| 6 | -3.948362000 | -0.979997000 | -1.204466000 | 6 | 3.533958000  | -2.109358000 | -1.701436000 |
| 6 | -3.140267000 | -2.025307000 | -1.755781000 | 6 | 3.800700000  | -0.810213000 | -2.253450000 |
| 6 | -2.691657000 | -3.089819000 | -0.834207000 | 6 | 1.924748000  | -4.055697000 | -0.276330000 |
| 6 | -1.523719000 | -3.841332000 | -1.155463000 | 6 | -0.793778000 | -3.836227000 | -1.245295000 |
| 6 | -0.628801000 | -4.341488000 | -0.144170000 | 6 | 0.334076000  | -3.783583000 | -2.124416000 |
| 6 | 0.711062000  | -4.361144000 | -0.726697000 | 6 | 0.803607000  | -4.258451000 | 0.616378000  |
| 6 | 1.821399000  | -4.085188000 | 0.060746000  | 6 | -0.550312000 | -4.097035000 | 0.185733000  |
| 6 | 2.927045000  | -3.293913000 | -0.472275000 | 6 | 2.980002000  | -3.317830000 | 0.426345000  |
| 6 | 3.455799000  | -2.512714000 | 0.615758000  | 6 | 3.758902000  | -2.331565000 | -0.255166000 |
| 6 | 4.034245000  | -1.225144000 | 0.413670000  | 6 | 4.212623000  | -1.231968000 | 0.547454000  |
| 6 | 4.211161000  | -0.833590000 | -0.960485000 | 6 | 4.438487000  | 0.084200000  | -0.040835000 |
| 6 | 4.158373000  | 0.575514000  | -1.339227000 | 6 | 4.237738000  | 0.294548000  | -1.395437000 |
| 6 | 4.052563000  | 1.545198000  | -0.359269000 | 6 | 0.333015000  | -3.314878000 | 2.850900000  |
| 6 | 3.210524000  | 2.714816000  | -0.588489000 | 6 | 1.246421000  | -3.786098000 | 1.926023000  |
| 6 | 2.404564000  | 2.814904000  | -1.777160000 | 6 | 2.542300000  | -3.130236000 | 1.789767000  |
| 6 | 1.202587000  | 3.572609000  | -1.643072000 | 6 | 2.825066000  | -1.918621000 | 2.519023000  |
| 6 | 0.027638000  | 3.281662000  | -2.477435000 | 6 | 3.729936000  | -1.015806000 | 1.886947000  |
| 6 | -1.158321000 | 3.594150000  | -1.721435000 | 6 | -2.721348000 | -2.986542000 | 0.754929000  |
| 6 | -2.365604000 | 2.826402000  | -1.855179000 | 6 | -1.530421000 | -3.637842000 | 1.191979000  |
| 6 | -3.157640000 | 2.525747000  | -0.641032000 | 6 | -1.087131000 | -3.292113000 | 2.519187000  |
| 6 | -3.925235000 | 1.320919000  | -0.595410000 | 6 | 1.823962000  | 1.934974000  | -3.480429000 |
| 6 | -4.055733000 | 0.549820000  | 0.617562000  | 6 | 2.945144000  | 1.206929000  | -3.098637000 |
| 6 | -4.154431000 | -0.855325000 | 0.235837000  | 6 | 3.632576000  | 1.540683000  | -1.870274000 |
| 6 | -3.696747000 | -1.832217000 | 1.100452000  | 6 | 4.045268000  | 1.111759000  | 0.910599000  |
| 6 | -3.002188000 | -3.001020000 | 0.568610000  | 6 | 2.550322000  | 2.946561000  | 1.428116000  |
| 6 | -2.083464000 | -3.458209000 | 1.583414000  | 6 | 3.395012000  | 2.319107000  | 0.470974000  |
| 6 | -0.828084000 | -4.057752000 | 1.247635000  | 6 | 3.123513000  | 2.524674000  | -0.965035000 |
| 6 | 0.356892000  | -3.764910000 | 2.088500000  | 6 | 1.945300000  | 3.312533000  | -1.379320000 |
| 6 | 1.657996000  | -3.778261000 | 1.479927000  | 6 | 1.368445000  | 3.035291000  | -2.658070000 |
| 6 | 2.669448000  | -2.810770000 | 1.821776000  | 6 | 0.650870000  | -2.162662000 | 3.690535000  |
| 6 | 2.460298000  | -1.819809000 | 2.825631000  | 6 | 1.832310000  | -1.384872000 | 3.473881000  |
| 6 | 3.088349000  | -0.491075000 | 2.668230000  | 6 | 1.761349000  | 0.068136000  | 3.724382000  |
| 6 | 3.875602000  | -0.192222000 | 1.458697000  | 6 | 2.667236000  | 0.980483000  | 2.997264000  |
| 6 | 3.990816000  | 1.175723000  | 1.051760000  | 6 | 3.642004000  | 0.431903000  | 2.118576000  |
| 6 | 3.254574000  | 2.235771000  | 1.706718000  | 6 | 2.239824000  | 2.321703000  | 2.691402000  |
| 6 | 2.729638000  | 3.162762000  | 0.696491000  | 6 | 1.394818000  | 3.756132000  | 1.018344000  |
| 6 | 1.442480000  | 3.765157000  | 0.849991000  | 6 | 1.062298000  | 3.914369000  | -0.358652000 |
| 6 | 0.744806000  | 4.062932000  | -0.369195000 | 6 | -0.335898000 | 4.115662000  | -0.643647000 |

|                                                                                               |              |               |              |                                                                                               |              |              |              |
|-----------------------------------------------------------------------------------------------|--------------|---------------|--------------|-----------------------------------------------------------------------------------------------|--------------|--------------|--------------|
| 6                                                                                             | -0.716239000 | 4.083832000   | -0.417745000 | 6                                                                                             | -0.904343000 | 3.654296000  | -1.905483000 |
| 6                                                                                             | -1.459729000 | 3.801169000   | 0.720484000  | 6                                                                                             | -0.072806000 | 3.130556000  | -2.878935000 |
| 6                                                                                             | -2.687774000 | 3.014150000   | 0.624650000  | 6                                                                                             | 0.084698000  | 1.957888000  | 3.812001000  |
| 6                                                                                             | -2.775491000 | 2.220407000   | 1.822389000  | 6                                                                                             | 0.920244000  | 2.791502000  | 3.084603000  |
| 6                                                                                             | -3.387739000 | 0.931620000   | 1.835127000  | 6                                                                                             | 0.381902000  | 3.653652000  | 2.038207000  |
| 6                                                                                             | -2.859125000 | -0.107878000  | 2.741680000  | 6                                                                                             | -1.020836000 | 3.636651000  | 1.721986000  |
| 6                                                                                             | -3.118694000 | -1.473297000  | 2.392807000  | 6                                                                                             | -1.353967000 | 3.955959000  | 0.370472000  |
| 6                                                                                             | -2.194624000 | -2.536900000  | 2.721752000  | 6                                                                                             | -0.617803000 | -1.551942000 | 4.021421000  |
| 6                                                                                             | -1.082882000 | -2.262422000  | 3.510414000  | 6                                                                                             | -0.678273000 | -0.186949000 | 4.277075000  |
| 6                                                                                             | 0.209726000  | -2.890703000  | 3.210250000  | 6                                                                                             | 0.522416000  | 0.613326000  | 4.187327000  |
| 6                                                                                             | 1.242448000  | -1.953898000  | 3.583095000  | 6                                                                                             | -3.357006000 | -1.949405000 | 1.529059000  |
| 6                                                                                             | 0.583356000  | -0.777457000  | 4.138636000  | 6                                                                                             | -2.788703000 | -1.459047000 | 2.753087000  |
| 6                                                                                             | 1.189683000  | 0.460071000   | 4.029848000  | 6                                                                                             | -1.688538000 | -2.213031000 | 3.268746000  |
| 6                                                                                             | 2.481512000  | 0.603673000   | 3.365154000  | 6                                                                                             | -3.537350000 | 0.853756000  | 2.109780000  |
| 6                                                                                             | 2.511116000  | 1.954334000   | 2.847139000  | 6                                                                                             | -4.079484000 | 0.320059000  | 0.857150000  |
| 6                                                                                             | 1.198728000  | 2.582922000   | 3.047168000  | 6                                                                                             | -3.989293000 | -1.036333000 | 0.582995000  |
| 6                                                                                             | 0.650014000  | 3.465192000   | 2.064567000  | 6                                                                                             | -1.825672000 | 0.601848000  | 3.815058000  |
| 6                                                                                             | -0.784278000 | 3.482587000   | 1.976706000  | 6                                                                                             | -2.870060000 | -0.008659000 | 3.045247000  |
| 6                                                                                             | -1.599045000 | 2.508383000   | 2.656367000  | 6                                                                                             | -2.526310000 | 3.351286000  | -0.272600000 |
| 6                                                                                             | -1.036876000 | 1.509456000   | 3.504525000  | 6                                                                                             | -1.354255000 | 1.935710000  | 3.539050000  |
| 6                                                                                             | -1.680667000 | 0.182081000   | 3.577791000  | 6                                                                                             | -1.915163000 | 2.739434000  | 2.489969000  |
| 6                                                                                             | -0.862252000 | -0.917299000  | 3.992266000  | 6                                                                                             | -3.077396000 | 2.195827000  | 1.846519000  |
| 6                                                                                             | 0.374042000  | 1.639811000   | 3.763862000  | 6                                                                                             | -3.356554000 | 2.491635000  | 0.437023000  |
| <b>([11]CPP<math>\supset</math>Sc<sub>3</sub>N@D<sub>5h</sub>-C<sub>80</sub>)<sup>+</sup></b> |              |               |              | <b>([11]CPP<math>\supset</math>Sc<sub>3</sub>N@D<sub>3h</sub>-C<sub>78</sub>)<sup>+</sup></b> |              |              |              |
| 6                                                                                             | 26.264554000 | -25.100850000 | -6.718041000 | 6                                                                                             | 6.258454000  | 0.650697000  | 4.858357000  |
| 6                                                                                             | 26.437897000 | -23.716717000 | -6.671219000 | 6                                                                                             | 6.773042000  | 1.412933000  | 3.806567000  |
| 6                                                                                             | 26.171271000 | -22.986690000 | -5.481836000 | 6                                                                                             | 6.172243000  | 2.644437000  | 3.430610000  |
| 6                                                                                             | 25.902690000 | -23.731191000 | -4.302834000 | 6                                                                                             | 5.122895000  | 3.137898000  | 4.247248000  |
| 6                                                                                             | 25.729014000 | -25.115789000 | -4.350596000 | 6                                                                                             | 4.607974000  | 2.376137000  | 5.297116000  |
| 6                                                                                             | 25.813338000 | -25.821612000 | -5.579135000 | 6                                                                                             | 5.116669000  | 1.081928000  | 5.583514000  |
| 6                                                                                             | 25.917353000 | -21.532091000 | -5.495997000 | 6                                                                                             | 6.452408000  | 3.295154000  | 2.134764000  |
| 6                                                                                             | 25.344002000 | -20.938817000 | -6.651191000 | 6                                                                                             | 6.815328000  | 2.505508000  | 1.013223000  |
| 6                                                                                             | 24.708254000 | -19.697892000 | -6.582500000 | 6                                                                                             | 6.733920000  | 3.017893000  | -0.282805000 |
| 6                                                                                             | 24.617978000 | -18.990327000 | -5.355665000 | 6                                                                                             | 6.283798000  | 4.343419000  | -0.518528000 |
| 6                                                                                             | 25.349674000 | -19.500753000 | -4.248833000 | 6                                                                                             | 6.079151000  | 5.179768000  | 0.610766000  |
| 6                                                                                             | 25.983181000 | -20.742705000 | -4.316971000 | 6                                                                                             | 6.162737000  | 4.667267000  | 1.906870000  |
| 6                                                                                             | 23.611354000 | -17.921246000 | -5.201741000 | 6                                                                                             | 5.808583000  | 4.712073000  | -1.866454000 |
| 6                                                                                             | 23.112095000 | -17.190910000 | -6.313827000 | 6                                                                                             | 6.311760000  | 4.093899000  | -3.042017000 |
| 6                                                                                             | 21.919265000 | -16.471468000 | -6.225148000 | 6                                                                                             | 5.585930000  | 4.120479000  | -4.234080000 |
| 6                                                                                             | 21.169451000 | -16.442880000 | -5.018324000 | 6                                                                                             | 4.314183000  | 4.753601000  | -4.306668000 |
| 6                                                                                             | 21.753255000 | -17.036762000 | -3.868624000 | 6                                                                                             | 3.915156000  | 5.530939000  | -3.186724000 |
| 6                                                                                             | 22.943979000 | -17.759378000 | -3.958940000 | 6                                                                                             | 4.645053000  | 5.513853000  | -1.997736000 |
| 6                                                                                             | 19.749233000 | -16.044820000 | -4.987263000 | 6                                                                                             | 3.337946000  | 4.426414000  | -5.366235000 |
| 6                                                                                             | 18.938148000 | -16.266082000 | -6.130235000 | 6                                                                                             | 3.475058000  | 3.235638000  | -6.131536000 |
| 6                                                                                             | 17.547259000 | -16.295549000 | -6.029439000 | 6                                                                                             | 2.403611000  | 2.707191000  | -6.851524000 |
| 6                                                                                             | 16.895675000 | -16.098819000 | -4.782809000 | 6                                                                                             | 1.126885000  | 3.329310000  | -6.834033000 |
| 6                                                                                             | 17.703122000 | -15.692765000 | -3.684424000 | 6                                                                                             | 1.042266000  | 4.605461000  | -6.211808000 |
| 6                                                                                             | 19.094943000 | -15.671294000 | -3.782673000 | 6                                                                                             | 2.119153000  | 5.142713000  | -5.506973000 |
| 6                                                                                             | 15.494995000 | -16.531591000 | -4.607655000 | 6                                                                                             | -0.098529000 | 2.602245000  | -7.222972000 |
| 6                                                                                             | 14.639074000 | -16.762897000 | -5.717466000 | 6                                                                                             | -0.100351000 | 1.182302000  | -7.267471000 |
| 6                                                                                             | 13.481206000 | -17.529737000 | -5.589070000 | 6                                                                                             | -1.293414000 | 0.459929000  | -7.236536000 |

|   |              |               |              |   |              |              |              |
|---|--------------|---------------|--------------|---|--------------|--------------|--------------|
| 6 | 13.103536000 | -18.098941000 | -4.341806000 | 6 | -2.543844000 | 1.123111000  | -7.141242000 |
| 6 | 13.855121000 | -17.701290000 | -3.203429000 | 6 | -2.550594000 | 2.534867000  | -7.288747000 |
| 6 | 15.022378000 | -16.948412000 | -3.333373000 | 6 | -1.356552000 | 3.256173000  | -7.337271000 |
| 6 | 12.148370000 | -19.226092000 | -4.286550000 | 6 | -3.711308000 | 0.383977000  | -6.622315000 |
| 6 | 11.368007000 | -19.606114000 | -5.414586000 | 6 | -3.883996000 | -1.010720000 | -6.830348000 |
| 6 | 10.804897000 | -20.879758000 | -5.509126000 | 6 | -4.755215000 | -1.753685000 | -6.031308000 |
| 6 | 10.978829000 | -21.834172000 | -4.471600000 | 6 | -5.486680000 | -1.141829000 | -4.977158000 |
| 6 | 11.582166000 | -21.386254000 | -3.267768000 | 6 | -5.427966000 | 0.273673000  | -4.877335000 |
| 6 | 12.154984000 | -20.117291000 | -3.179894000 | 6 | -4.564684000 | 1.018659000  | -5.682526000 |
| 6 | 10.803294000 | -23.282930000 | -4.692959000 | 6 | -6.086374000 | -1.928619000 | -3.879828000 |
| 6 | 11.101391000 | -23.828854000 | -5.968679000 | 6 | -5.551292000 | -3.200052000 | -3.546115000 |
| 6 | 11.357829000 | -25.192450000 | -6.123535000 | 6 | -5.806876000 | -3.787577000 | -2.305962000 |
| 6 | 11.320208000 | -26.073827000 | -5.011832000 | 6 | -6.612858000 | -3.135866000 | -1.335811000 |
| 6 | 10.844643000 | -25.555196000 | -3.777165000 | 6 | -7.293371000 | -1.957022000 | -1.743703000 |
| 6 | 10.595797000 | -24.190658000 | -3.619622000 | 6 | -7.036697000 | -1.368441000 | -2.983355000 |
| 6 | 11.981260000 | -27.391555000 | -5.101767000 | 6 | -6.526927000 | -3.540147000 | 0.083130000  |
| 6 | 12.147360000 | -28.072930000 | -6.336872000 | 6 | -6.070110000 | -4.828693000 | 0.471489000  |
| 6 | 13.079022000 | -29.105305000 | -6.469925000 | 6 | -5.620302000 | -5.073296000 | 1.770316000  |
| 6 | 13.891516000 | -29.503746000 | -5.375128000 | 6 | -5.608121000 | -4.042436000 | 2.747628000  |
| 6 | 13.606614000 | -28.932219000 | -4.107456000 | 6 | -6.224280000 | -2.811007000 | 2.406112000  |
| 6 | 12.674544000 | -27.902062000 | -3.973539000 | 6 | -6.672063000 | -2.566162000 | 1.105998000  |
| 6 | 15.139214000 | -30.273959000 | -5.559585000 | 6 | -4.794613000 | -4.139366000 | 3.977057000  |
| 6 | 15.854141000 | -30.176167000 | -6.781317000 | 6 | -3.595789000 | -4.898242000 | 3.962457000  |
| 6 | 17.200485000 | -30.539484000 | -6.858382000 | 6 | -2.623085000 | -4.727906000 | 4.949583000  |
| 6 | 17.895724000 | -31.019274000 | -5.717802000 | 6 | -2.801684000 | -3.791588000 | 6.000754000  |
| 6 | 17.130849000 | -31.289235000 | -4.551425000 | 6 | -4.067392000 | -3.153799000 | 6.101126000  |
| 6 | 15.785143000 | -30.926614000 | -4.474753000 | 6 | -5.039449000 | -3.322259000 | 5.112349000  |
| 6 | 19.371996000 | -30.984774000 | -5.693381000 | 6 | -1.627980000 | -3.339449000 | 6.776763000  |
| 6 | 20.150799000 | -31.054099000 | -6.879616000 | 6 | -0.465414000 | -4.143410000 | 6.917378000  |
| 6 | 21.484920000 | -30.642724000 | -6.888991000 | 6 | 0.764365000  | -3.576971000 | 7.259344000  |
| 6 | 22.105401000 | -30.138200000 | -5.713732000 | 6 | 0.890343000  | -2.178457000 | 7.477245000  |
| 6 | 21.375890000 | -30.229518000 | -4.499599000 | 6 | -0.305623000 | -1.415505000 | 7.522246000  |
| 6 | 20.042724000 | -30.642949000 | -4.489846000 | 6 | -1.535526000 | -1.982336000 | 7.181507000  |
| 6 | 23.341872000 | -29.331843000 | -5.764853000 | 6 | 2.191322000  | -1.482650000 | 7.387533000  |
| 6 | 23.648286000 | -28.590822000 | -6.935789000 | 6 | 3.214549000  | -2.018725000 | 6.562482000  |
| 6 | 24.559054000 | -27.534112000 | -6.902003000 | 6 | 4.253942000  | -1.214347000 | 6.089361000  |
| 6 | 25.207098000 | -27.163713000 | -5.695153000 | 6 | 4.317239000  | 0.163654000  | 6.420196000  |
| 6 | 25.032227000 | -28.015895000 | -4.571086000 | 6 | 3.408299000  | 0.644488000  | 7.400611000  |
| 6 | 24.123189000 | -29.074815000 | -4.605957000 | 6 | 2.370382000  | -0.160302000 | 7.874161000  |
| 1 | 26.437965000 | -25.631058000 | -7.664002000 | 1 | 6.727429000  | -0.311806000 | 5.103647000  |
| 1 | 26.743895000 | -23.182145000 | -7.580631000 | 1 | 7.639236000  | 1.037302000  | 3.245379000  |
| 1 | 25.702485000 | -23.204267000 | -3.361014000 | 1 | 4.627579000  | 4.081659000  | 3.986323000  |
| 1 | 25.397233000 | -25.638235000 | -3.444448000 | 1 | 3.722143000  | 2.742253000  | 5.831176000  |
| 1 | 25.282601000 | -21.513120000 | -7.584307000 | 1 | 7.050379000  | 1.442250000  | 1.148797000  |
| 1 | 24.166693000 | -19.333443000 | -7.464485000 | 1 | 6.905210000  | 2.343784000  | -1.131796000 |
| 1 | 25.383434000 | -18.932740000 | -3.309517000 | 1 | 5.815218000  | 6.236046000  | 0.464641000  |
| 1 | 26.502338000 | -21.131425000 | -3.430537000 | 1 | 5.966921000  | 5.330318000  | 2.760209000  |
| 1 | 23.649878000 | -17.220460000 | -7.270767000 | 1 | 7.264165000  | 3.547811000  | -3.004100000 |
| 1 | 21.539731000 | -15.949381000 | -7.113746000 | 1 | 5.988046000  | 3.595958000  | -5.110490000 |
| 1 | 21.205438000 | -17.035122000 | -2.918004000 | 1 | 2.955303000  | 6.060926000  | -3.199666000 |
| 1 | 23.299694000 | -18.303577000 | -3.075099000 | 1 | 4.235516000  | 6.026255000  | -1.117538000 |
| 1 | 19.404079000 | -16.546012000 | -7.083189000 | 1 | 4.410659000  | 2.664112000  | -6.093085000 |

|   |              |               |              |    |              |              |              |
|---|--------------|---------------|--------------|----|--------------|--------------|--------------|
| 1 | 16.967320000 | -16.593132000 | -6.911031000 | 1  | 2.544637000  | 1.757818000  | -7.383060000 |
| 1 | 17.234344000 | -15.433994000 | -2.726153000 | 1  | 0.089946000  | 5.150011000  | -6.206036000 |
| 1 | 19.691330000 | -15.400791000 | -2.900921000 | 1  | 1.987707000  | 6.108260000  | -5.002516000 |
| 1 | 14.915032000 | -16.387050000 | -6.710883000 | 1  | 0.843294000  | 0.628387000  | -7.198096000 |
| 1 | 12.906222000 | -17.758823000 | -6.494519000 | 1  | -1.248466000 | -0.632478000 | -7.141872000 |
| 1 | 13.564699000 | -18.044651000 | -2.202943000 | 1  | -3.507415000 | 3.073978000  | -7.316972000 |
| 1 | 15.624788000 | -16.756310000 | -2.436704000 | 1  | -1.401321000 | 4.350314000  | -7.412934000 |
| 1 | 11.243899000 | -18.913473000 | -6.256576000 | 1  | -3.298699000 | -1.519860000 | -7.608239000 |
| 1 | 10.257377000 | -21.159265000 | -6.419560000 | 1  | -4.842801000 | -2.835305000 | -6.199382000 |
| 1 | 11.719316000 | -22.088351000 | -2.435199000 | 1  | -5.980781000 | 0.787955000  | -4.081338000 |
| 1 | 12.717220000 | -19.864956000 | -2.273455000 | 1  | -4.459704000 | 2.095011000  | -5.495437000 |
| 1 | 11.263284000 | -23.158143000 | -6.822459000 | 1  | -4.824185000 | -3.678739000 | -4.214180000 |
| 1 | 11.716489000 | -25.555301000 | -7.095240000 | 1  | -5.271337000 | -4.707956000 | -2.041531000 |
| 1 | 10.710378000 | -26.227893000 | -2.919508000 | 1  | -8.003672000 | -1.472742000 | -1.060543000 |
| 1 | 10.274293000 | -23.810828000 | -2.640260000 | 1  | -7.551249000 | -0.434961000 | -3.247327000 |
| 1 | 11.561805000 | -27.762616000 | -7.212750000 | 1  | -6.031179000 | -5.639617000 | -0.267745000 |
| 1 | 13.208403000 | -29.586943000 | -7.448451000 | 1  | -5.236672000 | -6.070019000 | 2.026556000  |
| 1 | 14.208861000 | -29.214447000 | -3.234964000 | 1  | -6.242865000 | -1.991076000 | 3.135826000  |
| 1 | 12.571846000 | -27.405359000 | -3.000436000 | 1  | -7.032153000 | -1.560871000 | 0.854692000  |
| 1 | 15.388633000 | -29.690406000 | -7.648441000 | 1  | -3.369630000 | -5.542319000 | 3.103067000  |
| 1 | 17.752680000 | -30.327403000 | -7.782976000 | 1  | -1.660650000 | -5.242758000 | 4.836512000  |
| 1 | 17.612347000 | -31.752852000 | -3.679922000 | 1  | -4.275521000 | -2.487453000 | 6.949028000  |
| 1 | 15.232712000 | -31.111408000 | -3.543813000 | 1  | -5.993753000 | -2.785659000 | 5.200822000  |
| 1 | 19.689418000 | -31.401564000 | -7.813812000 | 1  | -0.519480000 | -5.220346000 | 6.708687000  |
| 1 | 22.048112000 | -30.675712000 | -7.831075000 | 1  | 1.653943000  | -4.218992000 | 7.313110000  |
| 1 | 21.819363000 | -29.856541000 | -3.567801000 | 1  | -0.255540000 | -0.333857000 | 7.701009000  |
| 1 | 19.477295000 | -30.582941000 | -3.551283000 | 1  | -2.414176000 | -1.329416000 | 7.103962000  |
| 1 | 23.074166000 | -28.760821000 | -7.855287000 | 1  | 3.123578000  | -3.042463000 | 6.177949000  |
| 1 | 24.670436000 | -26.906583000 | -7.795066000 | 1  | 4.950347000  | -1.629984000 | 5.349425000  |
| 1 | 25.589580000 | -27.817996000 | -3.645617000 | 1  | 3.491760000  | 1.679410000  | 7.758851000  |
| 1 | 23.983752000 | -29.689205000 | -3.706481000 | 1  | 1.654794000  | 0.256820000  | 8.595462000  |
| 6 | 15.057424000 | -23.874561000 | -7.297150000 | 7  | -0.018797000 | 0.123771000  | 0.263888000  |
| 6 | 14.563783000 | -23.799471000 | -5.964019000 | 21 | 0.260589000  | -0.378078000 | 2.230728000  |
| 6 | 15.792877000 | -25.050531000 | -7.751303000 | 21 | -1.740628000 | -0.513203000 | -0.522341000 |
| 6 | 15.636025000 | -22.702097000 | -7.946254000 | 21 | 1.243229000  | 1.256345000  | -0.789347000 |
| 6 | 14.587130000 | -22.503589000 | -5.317325000 | 6  | 3.695409000  | 1.407430000  | -0.983971000 |
| 6 | 14.697606000 | -24.948174000 | -5.112449000 | 6  | 3.179881000  | 0.923452000  | -2.253364000 |
| 6 | 14.767757000 | -22.357151000 | -3.895574000 | 6  | 2.260529000  | 1.807975000  | -2.948501000 |
| 6 | 15.100621000 | -21.318220000 | -5.961756000 | 6  | 1.217453000  | 1.257454000  | -3.799032000 |
| 6 | 15.436463000 | -26.120476000 | -5.564800000 | 6  | 1.107435000  | -0.144072000 | -4.023935000 |
| 6 | 14.903215000 | -24.812551000 | -3.686565000 | 6  | 4.055497000  | 0.486135000  | 0.080169000  |
| 6 | 16.074556000 | -26.152339000 | -6.868490000 | 6  | 3.949946000  | -0.909097000 | -0.114265000 |
| 6 | 16.019602000 | -26.762196000 | -4.399608000 | 6  | 3.441516000  | -1.423441000 | -1.365320000 |
| 6 | 17.361999000 | -26.875593000 | -6.996747000 | 6  | 3.032073000  | -0.548227000 | -2.438890000 |
| 6 | 16.784730000 | -24.592586000 | -8.700066000 | 6  | 1.997777000  | -1.041774000 | -3.321593000 |
| 6 | 14.975227000 | -23.525111000 | -3.052210000 | 6  | 2.351419000  | 0.887249000  | 3.397715000  |
| 6 | 15.781339000 | -25.896129000 | -3.256048000 | 6  | 3.255801000  | 0.258567000  | 2.453378000  |
| 6 | 15.836681000 | -23.372037000 | -1.925709000 | 6  | 3.724769000  | 1.074481000  | 1.360751000  |
| 6 | 15.356651000 | -21.054320000 | -3.634060000 | 6  | -1.269059000 | 1.472215000  | -3.723441000 |
| 6 | 16.701804000 | -24.460834000 | -1.483399000 | 6  | -1.376638000 | 0.035789000  | -3.923355000 |
| 6 | 16.542764000 | -22.114467000 | -1.705859000 | 6  | 0.021843000  | 2.065895000  | -3.645394000 |
| 6 | 17.238066000 | -27.512298000 | -4.513229000 | 6  | -0.213860000 | -0.757748000 | -4.070201000 |

|   |              |               |              |   |              |              |              |
|---|--------------|---------------|--------------|---|--------------|--------------|--------------|
| 6 | 17.908234000 | -27.556050000 | -5.818364000 | 6 | -0.143021000 | -2.047659000 | -3.409940000 |
| 6 | 18.253589000 | -27.269195000 | -3.491413000 | 6 | -1.245696000 | -2.567941000 | -2.635630000 |
| 6 | 16.754774000 | -25.705531000 | -2.197788000 | 6 | -0.903781000 | -3.483826000 | -1.569427000 |
| 6 | 18.048723000 | -26.414001000 | -2.320396000 | 6 | 2.707402000  | -2.645272000 | -1.061126000 |
| 6 | 17.912561000 | -23.861861000 | -0.962158000 | 6 | 1.557688000  | -3.028386000 | -1.835325000 |
| 6 | 18.304194000 | -26.408858000 | -7.981912000 | 6 | 1.237414000  | -2.244759000 | -2.985771000 |
| 6 | 18.014830000 | -25.259943000 | -8.815644000 | 6 | 0.476977000  | -3.705014000 | -1.166668000 |
| 6 | 19.751502000 | -26.416002000 | -7.753515000 | 6 | -2.859253000 | 2.869331000  | -0.630241000 |
| 6 | 19.339773000 | -27.444742000 | -5.567199000 | 6 | -2.073601000 | 2.929515000  | -1.832916000 |
| 6 | 16.353659000 | -20.975824000 | -2.568236000 | 6 | -2.301863000 | 1.894982000  | -2.809546000 |
| 6 | 17.848261000 | -22.428662000 | -1.130750000 | 6 | -3.092667000 | 0.712358000  | -2.467843000 |
| 6 | 17.513677000 | -20.160716000 | -2.818993000 | 6 | -4.006123000 | -0.748309000 | -0.690749000 |
| 6 | 15.562261000 | -20.387055000 | -4.936875000 | 6 | -3.815875000 | 0.596990000  | -1.233365000 |
| 6 | 18.815231000 | -20.467343000 | -2.235681000 | 6 | -3.689957000 | 1.708399000  | -0.320160000 |
| 6 | 17.733504000 | -19.510347000 | -4.110255000 | 6 | -2.490908000 | -1.757355000 | -2.511826000 |
| 6 | 19.147025000 | -24.535318000 | -1.074400000 | 6 | -2.484213000 | -0.450320000 | -3.125372000 |
| 6 | 19.218360000 | -25.821040000 | -1.740866000 | 6 | -3.352647000 | -1.920454000 | -1.339646000 |
| 6 | 20.350693000 | -23.791360000 | -1.355990000 | 6 | -0.735514000 | 3.558820000  | -1.761724000 |
| 6 | 19.022279000 | -21.666559000 | -1.460855000 | 6 | 0.295474000  | 3.101671000  | -2.671761000 |
| 6 | 20.308417000 | -22.378332000 | -1.580976000 | 6 | -2.363328000 | 3.391721000  | 0.621210000  |
| 6 | 19.811538000 | -19.965913000 | -3.148061000 | 6 | -1.091407000 | 4.005246000  | 0.682507000  |
| 6 | 19.549013000 | -27.293719000 | -4.145953000 | 6 | -0.286077000 | 4.096968000  | -0.508438000 |
| 6 | 20.531946000 | -25.907377000 | -2.383676000 | 6 | -2.816409000 | 2.549860000  | 1.707177000  |
| 6 | 16.795816000 | -19.642068000 | -5.201129000 | 6 | -1.977915000 | 2.273216000  | 2.841883000  |
| 6 | 19.175761000 | -19.423632000 | -4.323160000 | 6 | -2.179715000 | 1.004278000  | 3.502752000  |
| 6 | 17.382488000 | -19.731548000 | -6.512294000 | 6 | -3.855983000 | -0.912133000 | 0.749787000  |
| 6 | 18.824827000 | -19.647368000 | -6.732816000 | 6 | -3.707373000 | 0.196829000  | 1.681163000  |
| 6 | 16.823157000 | -20.590989000 | -7.563071000 | 6 | -3.656530000 | 1.513961000  | 1.124724000  |
| 6 | 21.026683000 | -20.679970000 | -3.293022000 | 6 | -3.001853000 | -0.043737000 | 2.904480000  |
| 6 | 21.299372000 | -21.850547000 | -2.503655000 | 6 | 1.120466000  | 3.968982000  | -0.098101000 |
| 6 | 21.687404000 | -20.807288000 | -4.569681000 | 6 | 2.136593000  | 3.430134000  | -0.970767000 |
| 6 | 19.751552000 | -19.586351000 | -5.633413000 | 6 | 1.711226000  | 3.021951000  | -2.291746000 |
| 6 | 21.045792000 | -20.286129000 | -5.768133000 | 6 | 3.172924000  | 2.628441000  | -0.337919000 |
| 6 | 19.121972000 | -20.410128000 | -7.923257000 | 6 | 1.141896000  | 3.765861000  | 1.343202000  |
| 6 | 21.230737000 | -24.656748000 | -2.149356000 | 6 | 1.784197000  | 2.207911000  | 3.121427000  |
| 6 | 22.261482000 | -22.670847000 | -3.236761000 | 6 | 2.149708000  | 2.948285000  | 1.954653000  |
| 6 | 15.697340000 | -21.430681000 | -7.286777000 | 6 | 3.172749000  | 2.395369000  | 1.098538000  |
| 6 | 17.907724000 | -21.034709000 | -8.413846000 | 6 | -0.639943000 | 2.900733000  | 2.902107000  |
| 6 | 16.728682000 | -23.146988000 | -8.796442000 | 6 | -0.231320000 | 3.760557000  | 1.822448000  |
| 6 | 20.359067000 | -21.076345000 | -8.048896000 | 6 | 0.417048000  | 2.218540000  | 3.615536000  |
| 6 | 21.329003000 | -20.993435000 | -6.981767000 | 6 | -1.227960000 | -1.092456000 | 4.047669000  |
| 6 | 20.416025000 | -22.398786000 | -8.644257000 | 6 | -1.104292000 | 0.350151000  | 4.224885000  |
| 6 | 17.925281000 | -22.367985000 | -8.963624000 | 6 | 0.191611000  | 0.954835000  | 4.302951000  |
| 6 | 19.220441000 | -23.070999000 | -9.087503000 | 6 | -0.043442000 | -1.907875000 | 3.955290000  |
| 6 | 22.529922000 | -22.007893000 | -4.533934000 | 6 | -3.172671000 | -2.162837000 | 1.014036000  |
| 6 | 22.056224000 | -22.270249000 | -6.953251000 | 6 | -2.357185000 | -2.381979000 | 2.190236000  |
| 6 | 21.486462000 | -23.125793000 | -7.992860000 | 6 | -2.372799000 | -1.334616000 | 3.184050000  |
| 6 | 19.235083000 | -24.508561000 | -9.037815000 | 6 | -0.866043000 | -3.802926000 | 0.767464000  |
| 6 | 20.317636000 | -25.245293000 | -8.409233000 | 6 | -1.722251000 | -3.591322000 | -0.380974000 |
| 6 | 21.430870000 | -24.550386000 | -7.828718000 | 6 | -2.878438000 | -2.773153000 | -0.259746000 |
| 6 | 22.029950000 | -25.101661000 | -6.638632000 | 6 | -0.015298000 | -2.900982000 | 2.892314000  |
| 6 | 22.599906000 | -24.240843000 | -5.615843000 | 6 | -1.158905000 | -3.212978000 | 2.043826000  |

|    |             |              |             |   |            |             |            |
|----|-------------|--------------|-------------|---|------------|-------------|------------|
| 6  | 21.46518000 | -26.26518800 | -5.98929500 | 6 | 2.74032700 | -2.85120300 | 0.36691400 |
| 6  | 22.65433500 | -22.79908100 | -5.75547000 | 6 | 1.33269300 | -2.95581900 | 2.36528000 |
| 6  | 22.36350600 | -24.88298800 | -4.32543200 | 6 | 1.61289300 | -3.42514600 | 1.03759600 |
| 6  | 22.14287400 | -24.11518100 | -3.12364300 | 6 | 0.50357400 | -3.90001700 | 0.26381600 |
| 6  | 21.67019000 | -26.13384200 | -4.56243300 | 6 | 1.40192800 | 0.13896700  | 4.21148100 |
| 6  | 20.70441800 | -26.61625300 | -3.61143100 | 6 | 1.29098500 | -1.29691000 | 4.04553100 |
| 6  | 20.28298400 | -26.89494500 | -6.52071600 | 6 | 2.11105200 | -1.90768700 | 3.00460200 |
| 7  | 18.53554200 | -23.47051700 | -4.85989800 | 6 | 3.14182900 | -1.19988900 | 2.24597500 |
| 21 | 17.86958900 | -25.38707700 | -4.98340300 | 6 | 3.49903500 | -1.75643500 | 0.97407500 |
| 21 | 20.51738300 | -23.07708300 | -4.74261400 |   |            |             |            |
| 21 | 17.19901500 | -21.97336200 | -4.68860500 |   |            |             |            |

#### 4. Literature

- [1] S. Stevenson, G. Rice, T. Glass, K. Harich, F. Cromer, M. R. Jordan, J. Craft, E. Hadju, R. Bible, M. M. Olmstead, K. Maitra, A. J. Fisher, A. L. Balch, H. C. Dorn, *Nature* **1999**, *401*, 55-57.
- [2] M. R. Cerón, F.-F. Li, L. Echegoyen, *Chem. Eur. J.* **2013**, *19*, 7410-7415.
- [3] M. R. Cerón, M. Izquierdo, N. Alegret, J. A. Valdez, A. Rodríguez-Fortea, M. M. Olmstead, A. L. Balch, J. M. Poblet, L. Echegoyen, *Chem. Commun.* **2016**, *52*, 64-67.
- [4] G. J. Van Berkel, F. Zhou, *Anal. Chem.* **1994**, *66*, 3408-3415.
- [5] M. Freiberger, M. B. Minameyer, I. Solymosi, S. Frühwald, M. Krug, Y. Xu, A. Hirsch, T. Clark, D. Guldi, M. von Delius, K. Amsharov, A. Görling, M. E. Pérez-Ojeda, T. Drewello, *Chemistry – A European Journal*, **2023**, e202203734.
- [6] M. Freiberger, I. Solymosi, E. M. Freiberger, A. Hirsch, M. E. Pérez-Ojeda, T. Drewello, *Nanoscale* **2023**, *15*, 5665-5670.
- [7] F. Schwer, S. Zank, M. Freiberger, R. Kaur, S. Frühwald, C. C. Robertson, A. Görling, T. Drewello, D. M. Guldi, M. von Delius, *Organic Materials* **2022**, *4*, 7-17.
- [8] V. Gabelica, E. D. Pauw, *J. Mass Spectrom.* **2001**, *36*, 397-402.
- [9] N. Vinokur, V. Ryzhov, *J. Mass Spectrom.* **2004**, *39*, 1268-1274.
- [10] E. E. Jellen, A. M. Chappell, V. Ryzhov, *Rapid Commun. Mass Spectrom.* **2002**, *16*, 1799-1804.
- [11] L. A. Hayes, A. M. Chappell, E. E. Jellen, V. Ryzhov, *Int. J. Mass Spectrom.* **2003**, *227*, 111-120.
- [12] W. M. David, J. S. Brodbelt, *J. Am. Soc. Mass Spectrom.* **2003**, *14*, 383-392.
- [13] Á. Kuki, L. Nagy, G. Shemirani, A. Memboeuf, L. Drahos, K. Vékey, M. Zsuga, S. Kéki, *Rapid Commun. Mass Spectrom.* **2012**, *26*, 304-308.
- [14] C. L. Huffman, M. L. Williams, D. M. Benoist, R. E. Overstreet, E. E. Jellen-McCullough, *Rapid Commun. Mass Spectrom.* **2011**, *25*, 2299-2306.
- [15] E. Mishra, J. L. Worlinsky, T. M. Gilbert, C. Brückner, V. Ryzhov, *J. Am. Soc. Mass Spectrom.* **2012**, *23*, 1135-1146.
- [16] S. Indelicato, D. Bongiorno, S. Indelicato, L. Drahos, V. Turco Liveri, L. Turiák, K. Vékey, L. Ceraulo, *J. Mass Spectrom.* **2013**, *48*, 379-383.
- [17] J. F. Hitzenberger, P. O. Dral, U. Meinhardt, T. Clark, W. Thiel, M. Kivala, T. Drewello, *ChemPlusChem* **2017**, *82*, 204-211.
- [18] T. Iwamoto, Y. Watanabe, T. Sadahiro, T. Haino, S. Yamago, *Angew. Chem. Int. Ed.* **2011**, *50*, 8342-8344.
- [19] C. Lee, W. Yang, R. G. Parr, *Phys. Rev. B* **1988**, *37*, 785-789.
- [20] A. D. Becke, *Physical Review A* **1988**, *38*, 3098-3100.
- [21] S. Grimme, J. Antony, S. Ehrlich, H. Krieg, *J. Chem. Phys.* **2010**, *132*, 154104.
- [22] S. Grimme, S. Ehrlich, L. Goerigk, *J. Comput. Chem.* **2011**, *32*, 1456-1465.
- [23] F. Weigend, *Phys. Chem. Chem. Phys.* **2006**, *8*, 1057-1065.
- [24] F. Weigend, R. Ahlrichs, *Phys. Chem. Chem. Phys.* **2005**, *7*, 3297-3305.
- [25] D. Andrae, U. Häußermann, M. Dolg, H. Stoll, H. Preuß, *Theor. chim. acta* **1990**, *77*, 123-141.
- [26] X. Cao, M. Dolg, *J. Chem. Phys.* **2001**, *115*, 7348-7355.
- [27] M. Dolg, H. Stoll, A. Savin, H. Preuss, *Theor. chim. acta* **1989**, *75*, 173-194.
- [28] M. Dolg, H. Stoll, H. Preuss, *Theor. chim. acta* **1993**, *85*, 441-450.
- [29] F. Neese, *WIREs Comput. Mol. Sci.* **2012**, *2*, 73-78.



- [30] F. Neese, *WIREs Comput. Mol. Sci.* **2018**, 8, e1327.
- [31] G. A. Zhurko, Chemcraft - graphical software for visualization of quantum chemistry computations. Version 1.80 (build 523 b, <https://chemcraftprog.com>).
- [32] A. Otero-de-la-Roza, E. R. Johnson, V. Luaña, *Comput. Phys. Commun.* **2014**, 185, 1007-1018.
